1           **Interspecies metabolite transfer in a co-culture of *Dehalococcoides* and**  
2                   ***Sulfurospirillum* leads to rapid and complete tetrachloroethene**  
3                           **dechlorination**

4  
5   **Stefan Kruse<sup>1</sup>, Dominique Türkowsky<sup>2</sup>, Jan Birkigt<sup>3</sup>, Bruna Matturro<sup>4</sup>, Steffi Franke<sup>3</sup>, Nico**  
6   **Jehmlich<sup>2</sup>, Martin von Bergen<sup>2,7</sup>, Martin Westermann<sup>5</sup>, Simona Rossetti<sup>4</sup>, Ivonne Nijenhuis<sup>3</sup>,**  
7   **Lorenz Adrian<sup>3,7</sup>, Gabriele Diekert<sup>1</sup>, Tobias Goris<sup>1</sup>**

8   <sup>1</sup>Department of Applied and Ecological Microbiology, Institute of Microbiology, Friedrich Schiller  
9   University, Jena, Germany

10   <sup>2</sup>Department Molecular Systems Biology, Helmholtz Centre for Environmental Research – UFZ,  
11   Leipzig, Germany

12   <sup>3</sup>Department of Isotope Biogeochemistry, Helmholtz Centre for Environmental Research – UFZ,  
13   Leipzig, Germany

14   <sup>4</sup>Water Research Institute, IRSA-CNR, Monterotondo, Rome, Italy

15   <sup>5</sup>Center for Electron Microscopy of the University Hospital Jena, Jena, Germany

16   <sup>6</sup>Institute of Biochemistry, Faculty of Life Sciences, University of Leipzig, Leipzig, Germany

17   <sup>7</sup>Chair of Geobiotechnology, Technische Universität Berlin, Germany

18

19

## 20 **Abstract**

21 Microbial communities involving dehalogenating bacteria assist in bioremediation of areas  
22 contaminated with chlorinated hydrocarbons. To understand molecular interactions between  
23 dehalogenating bacteria, we co-cultured two bacterial species dechlorinating chloroethenes:  
24 *Sulfurospirillum multivorans*, dechlorinating tetrachloroethene (PCE) to *cis*-1,2-dichloroethene (cDCE)  
25 and *Dehalococcoides mccartyi* strains BTF08 or 195, transforming PCE via cDCE to ethene. The  
26 interaction of these bacteria cultivated with lactate as electron donor and PCE as electron acceptor  
27 was investigated using growth studies, metabolite analysis, microscopy, isotope fractionation and  
28 proteomics. Co-cultures exhibited more than 3-fold higher PCE to ethene dechlorination rates than *D.*  
29 *mccartyi* pure cultures. *S. multivorans* provided hydrogen, acetate and the reductive dehalogenase  
30 cobamide cofactor to *D. mccartyi*. While *D. mccartyi* 195 dechlorinated cDCE in the presence of  
31 norpseudo-B<sub>12</sub> produced by *S. multivorans*, cDCE dechlorination by *D. mccartyi* BTF08 depended on  
32 the supply of 5,6-dimethylbenzimidazole for producing functional cobamides. Co-cultures were  
33 characterized by the formation of aggregates and electron microscopy revealed an extracellular matrix  
34 enabling cell-to-cell contact. *D. mccartyi* showed an unusual barrel-like morphology, probably  
35 dependent on down-regulation of cell division gene expression, as observed in the co-culture  
36 proteome. Only the reductive dehalogenases PteA and VcrA were found in the proteomes of *D.*  
37 *mccartyi* BTF08 during dehalogenation of PCE to ethene.

38

## 39 **Introduction**

40 Microbial communities are characterized by numerous interactions involving the exchange and  
41 consumption of metabolic products. Molecular hydrogen, for example, is an important electron carrier  
42 in syntrophic communities, in which hydrogen is produced by e.g. fermentation and taken up by  
43 hydrogen-consuming prokaryotes. This hydrogen consumption leads to a lower hydrogen partial  
44 pressure, which allows otherwise thermodynamically unfavorable reactions to proceed. Therefore, the  
45 involved bacteria are physiologically dependent on each other (Morris et al 2013, Schink and Stams  
46 2013, Stams and Plugge 2009). The probably carcinogenic groundwater pollutant tetrachloroethene  
47 (PCE) is completely dechlorinated to ethene especially in communities involving hydrogen transfer  
48 from fermenting bacteria to the obligate hydrogen-consuming *D. mccartyi* (Cichocka et al 2010,

49 Duhamel and Edwards 2006, Jugder et al 2016, Wei et al 2016). PCE and other organohalides such  
50 as hexachlorobenzene or polychlorinated biphenyls are used as terminal electron acceptors by *D.*  
51 *mccartyi* and further bacteria in an anaerobic respiratory chain coupling the dehalogenation to energy  
52 conservation via electron transport phosphorylation (Jugder et al., 2016). This process is termed  
53 organohalide respiration (OHR) and involves the corrinoid-containing reductive dehalogenases  
54 (RDases) as terminal reductases (Leys et al 2013, Schubert and Diekert 2016, Schubert et al 2018).  
55 However, *D. mccartyi* is characterized by low growth rates resulting in low dechlorination rates (Löffler  
56 et al 2013). Moreover, these bacteria are strictly dependent on specific nutrients and vitamins in their  
57 habitats (Zinder 2016). Besides being restricted to hydrogen as electron donor, *D. mccartyi* uses only  
58 acetate plus bicarbonate as carbon source and organohalides as electron acceptors. Additionally,  
59 these bacteria are not able to *de novo* synthesize corrinoids, the obligate cofactor of RDases (Löffler  
60 et al 2013, Schipp et al 2013). While proteins for complete corrinoid biosynthesis are usually not  
61 encoded in the genomes of *D. mccartyi* (Türkowsky et al 2018), different studies revealed its ability to  
62 salvage and remodel corrinoids, enabling *D. mccartyi* to restore dechlorination (He et al 2007, Men et  
63 al 2014, Yi et al 2012). The functionality of the corrinoid and thus the RDase is directly dependent on  
64 the type of the lower base in *D. mccartyi*. Only three types of corrinoids have so far been described to  
65 be functional in *D. mccartyi* strain 195: 5,6-dimethylbenzimidazolyl-cobamide ([DMB]-Cba), 5-  
66 methylbenzimidazolyl-cobamide and 5-methoxybenzimidazolyl-cobamide. Nonfunctional corrinoids  
67 e.g. 5-hydroxybenzimidazolyl-cobamide or 7-adeninyl-cobamide ([Ade]Cba) can be converted to  
68 functional ones by replacement of the lower ligand in *D. mccartyi* when 5,6-dimethylbenzimidazole  
69 (DMB) is provided (Men et al 2014, Yi et al 2012).

70 Different studies on dechlorinating communities containing *D. mccartyi* in association with fermenting,  
71 acetogenic and/or methanogenic bacteria revealed higher dechlorination and growth rates than those  
72 of pure cultures (DiStefano et al 1992, He et al 2003a, He et al 2003b, Maymo-Gatell et al 1997). It is  
73 assumed that cross-feeding and a constant supply of growth factors such as corrinoids and biotin  
74 enhance growth (Richardson 2016). Within these communities, non-dechlorinating fermenting bacteria  
75 provide hydrogen, acetate and CO<sub>2</sub> from e.g. lactate or butyrate fermentation. The fermenting bacteria  
76 are dependent on hydrogen consumers which keep the hydrogen partial pressure low (Cheng et al  
77 2010, Mao et al 2015, Men et al 2012, Richardson et al 2002). For example, co-culture experiments  
78 revealed an interspecies hydrogen transfer between *Desulfovibrio desulfuricans* fermenting lactate

79 and *D. mccartyi* dechlorinating TCE (He et al 2007). Acetogens like *Sporomusa ovata* and sulfidogens  
80 (*Desulfovibrio*), produce different types of corrinoids which can be used by *D. mccartyi* (Duhamel and  
81 Edwards 2007, Guimaraes et al 1994). An interspecies cobamide transfer was also shown between  
82 *Methanosarcina barkeri* strain Fusaro and *D. mccartyi* strain BAV1, GT and FL2, when DMB was  
83 present. In the only co-culture of *D. mccartyi* (strains BAV1 and FL2) with a PCE-dechlorinating  
84 bacterium, *Geobacter lovleyi*, a corrinoid transfer was also observed (Yan et al 2012, Yan et al 2013).  
85 In this co-culture, however, hydrogen had to be supplemented. All these studies showed a more  
86 robust growth of *D. mccartyi* in co-cultures, resulting in higher dechlorination rates and cell yields than  
87 in pure cultures.

88 One single PCE-dechlorinating bacterium providing hydrogen, acetate and a corrinoid to *D. mccartyi* in  
89 a co-culture has never been described. A co-culture with such a syntrophic partner could aid in the  
90 optimization of bioremediation and bioaugmentation using *D. mccartyi*-containing cultures. Recently,  
91 the PCE to cDCE-respiring Epsilonproteobacterium *Sulfurospirillum multivorans*, capable of *de novo*  
92 corrinoid production (Kräutler et al 2003, Neumann et al 1996, Schubert 2017), was shown to produce  
93 hydrogen and acetate under fermentative growth conditions, e.g. with pyruvate or lactate and without  
94 electron acceptor present (Kruse et al 2017a). In the same study, a co-culture of *S. multivorans* with a  
95 methanogen dependent on hydrogen as electron donor was established. Therefore, *S. multivorans*  
96 was a promising partner for a co-cultivation with *D. mccartyi*. In addition, it was of interest, whether *D.*  
97 *mccartyi* is able to take up and utilize norpseudob<sub>12</sub> ([Ade]NCba) so far known to be produced  
98 exclusively by *S. multivorans* and *S. haloferax* (Goris et al 2017, Schubert 2017)

99 In this study, we investigated the physiological interaction between *D. mccartyi* BTF08 and 195 in co-  
100 culture with *S. multivorans*. *S. multivorans* produced hydrogen and acetate during lactate fermentation,  
101 which occurred after the electron acceptor PCE was dehalogenated to cDCE. The co-cultures showed  
102 an enhanced PCE-to-ethene dechlorination rate compared to the pure cultures. Additionally,  
103 interspecies cobamide transfer was detected. Electron microscopic and FISH analysis of co-cultures  
104 showed association of both organisms in aggregates. The *S. multivorans/D. mccartyi* co-culture is a  
105 candidate for bioaugmentation of PCE-contaminated sites and for studying interactions between  
106 different OHRB.

107

## 108 **Materials and Methods**

### 109 **Growth conditions of pure cultures**

110 *D. mccartyi* cultures BTF08 and 195 (maintained at UFZ Leipzig) were cultivated in 200 mL serum  
111 bottles containing 100 mL bicarbonate-buffered mineral salt medium with 5 mM acetate and 148 nM  
112 vitamin B<sub>12</sub> (cyanocobalamin, ca. 200 µg/L), reduced with Na<sub>2</sub>S (5% w/w) (Maymó-Gatell et al 1999).  
113 Anoxic atmosphere was established by 30 cycles of gassing and degassing with nitrogen and CO<sub>2</sub>  
114 was added to a final atmosphere of N<sub>2</sub>:CO<sub>2</sub> (75:25 v/v 1.5 bar overpressure). After autoclaving the  
115 medium, hydrogen [150 kPa] was applied. PCE (>99% purity, Sigma Aldrich, Steinheim, Germany)  
116 and cDCE (97% purity, Sigma Aldrich, Steinheim, Germany) served as electron acceptors and were  
117 added with a microliter syringe (Hamilton, Bonaduz, Switzerland) to a final concentration of 0.35 mM  
118 (aqueous phase concentration). Re-feeding of the cultures was done with the same amount of PCE or  
119 cDCE after complete conversion to ethene. After maximally three re-feeding steps, cultures were  
120 transferred [10% (v/v)] into fresh medium. To evaluate the effect of different types and concentrations  
121 of B<sub>12</sub> on dechlorination activities, *D. mccartyi* cultures received 54 nM norpseudo-B<sub>12</sub> ([Ade]Cba) or 5-  
122 OMeBza-B<sub>12</sub> ([5-OMeBza]Cba), each. Norpseudo-B<sub>12</sub> was extracted as described previously (Keller et  
123 al 2014) from 6 L of *S. multivorans* grown anaerobically with 40 mM pyruvate and 10 mM PCE as  
124 described elsewhere (Kruse et al 2017b). 5-OMeBza-B<sub>12</sub> was obtained from 6L of *Desulfitobacterium*  
125 *hafniense* DCB2 grown anaerobically with 40 mM pyruvate and 10 mM ClOHPA (3-chloro-4-hydroxy-  
126 phenylacetate) on a medium amended with 25 µM 5-OMeBza (Schubert et al 2018). *S. multivorans*  
127 (DSMZ 12446) was cultured in the same mineral salt medium as *D. mccartyi* with 40 mM lactate and  
128 10mM nominal PCE in hexadecane but without the addition of acetate and hydrogen (Maymó-Gatell et  
129 al 1999). All cultivation experiments were performed statically at 28°C in the dark and in biological  
130 triplicates.

### 131 **Growth of co-cultures of *S. multivorans* and *D. mccartyi***

132 Co-cultures of *S. multivorans* and *D. mccartyi* strain BTF08 or 195 were maintained in the same  
133 mineral salt medium as the pure cultures, without acetate and hydrogen. The medium contained 25  
134 mM lactate as the electron donor for *S. multivorans* and 0.35 mM PCE (aqueous-phase concentration)  
135 as the electron acceptor. Lactate and PCE was re-fed after depletion in the same concentration as the

136 initial dose. The B<sub>12</sub>-dependance of the co-cultures was tested with 148 nM vitamin B<sub>12</sub> serving as the  
137 positive control and without vitamin B<sub>12</sub> amendmets. Cultures without vitamin B<sub>12</sub> received 1 µM DMB  
138 (>99% purity, Sigma Aldrich, Steinheim, Germany), where indicated. For isotope fractionation  
139 experiments, *S. multivorans* and Sm/BTF08 co-cultures were cultivated in 50 mL serum bottles with 25  
140 mL medium. Replicate bottles were inoculated at the same time and the dehalogenation process was  
141 stopped at different time points by addition of 3 mL 2 M Na<sub>2</sub>SO<sub>4</sub> (pH 1.0).

#### 142 **Quantitative (q)PCR analysis of cell growth**

143 DNA was extracted from 1 mL co-culture taken from different time points during the cultivation  
144 experiment using the NucleoSpin Tissue DNA extraction kit according to the manufacturer's  
145 instructions (Macherey-Nagel, Düren, Germany). Quantitative PCR (qPCR) was applied to enumerate  
146 *Sulfurospirillum* and *Dehalococcoides* 16S rRNA gene copies. The qPCR reaction mixture contained 1  
147 µl of gDNA or DNA standard, 6.25 µl 1x KAPA SYBR Fast master mix (Sigma Aldrich, Steinheim,  
148 Germany) and 0.208 µM forward and reverse primer. Primers used were Dhc\_sp\_16S\_fw (5'-  
149 GTATCGACCCTCTCTGTGCCG-3') and Dhc\_sp\_16S\_rev (5'-GCAAGTTCCTGACTTAACAGGTCGT-  
150 3') for *D. mccartyi* and Smul\_16S\_fw (5'-AGGCTAGTTTACTAGAACTTAGAG-3') and Smul\_16S\_rev  
151 (5'-CAGTCTGATTAGAGTGCTCAG-3') for *S. multivorans*. The conditions of the PCR program were  
152 as followed: 95°C for 2 min (initial denaturation) followed by 40 cycles of 55°C (*S. multivorans* primer)  
153 or 60°C (*D. mccartyi* primer) for 20s (annealing), 72°C for 30s (elongation) and 95°C for 10 s  
154 (denaturation). Each PCR included a melting curve for verification of specific target DNA amplification.  
155 Standard curves were done from extracted gDNA from different cell number preparations of *S.*  
156 *multivorans* and *D. mccartyi* strains BTF08 and 195. For this, the cell number preparations contained  
157 the same cell number of both organisms from which genomic DNA was isolated. The obtained C<sub>T</sub>  
158 values were compared with the standard curve to determine the different cell numbers. All samples  
159 were conducted in three biological replicates with two corresponding technical replicates or three  
160 technical replicates for the calibration curve.

#### 161 **Analytical methods**

162 Ethene and chlorinated ethenes were quantified gas chromatographically with a flame ionization  
163 detector (Clarus 500, Perkin Elmer, Rodgau, Germany) and a CP-PoraBOND Q FUSED SILICA 25 m  
164 x 0.32 mm column (Agilent Technologies, Böblingen, Germany). A headspace sample from 1 mL

165 culture as well as from 1 mL gas phase was taken using a gas-tight syringe (Hamilton, Bonaduz,  
166 Switzerland) and subsequently analyzed. Ethene and chlorinated ethenes were separated as follows:  
167 4 min at 60°C to 280°C in 10°C min<sup>-1</sup> steps. The injector temperature was fixed at 250°C and detector  
168 temperature at 300°C. Standard curves of ethene and each chlorinated ethene were recorded for peak  
169 area quantification and retention times were compared to known standards. Hydrogen was measured  
170 using a thermal conductivity detector (AutoSystem, Perkin Elmer, Rodgau, Germany). Organic acids  
171 (e.g. lactate and acetate) were analyzed by HPLC and separated on an AMINEX HPX-87H column  
172 (7.8 x 300 mm; BioRad, Munich, Germany) using 5 mM as mobile phase and at a flow rate of 0.7 mL  
173 min<sup>-1</sup>.

#### 174 **Compound-specific stable isotope analysis**

175 Determination of the carbon isotope composition of the chlorinated ethenes in pure culture of *S.*  
176 *multivorans* and in co-culture of *S. multivorans* and *D. mccartyi* strain BTF08 was done using gas  
177 chromatography combustion isotope ratio mass spectrometry (GC-C-IRMS; Thermo GC Trace 1320  
178 combined with Thermo-Finnigan MAT 253 IRMS, Bremen, Germany) (Schmidt et al 2014). All samples  
179 were analyzed in technical triplicates. 2 mL liquid phase were taken from the respective sample and  
180 transferred to a He-flushed 10 mL crimped vial. Of these, 1 mL was taken from the headspace via an  
181 autosampler (Thermo TriPlus RSH Autosampler, Bremen, Germany) and injected in a gas  
182 chromatograph with a split ratio of 1:5. Chlorinated ethenes were separated on a DB-MTBE column  
183 (60 m x 0.32 mm x 1.8 µm, J&W Scientific, Waldbronn, Germany) and the following temperature  
184 program: 40°C for 5 min, increase to 250°C by 20°C min<sup>-1</sup> and hold for 5 min using helium as carrier  
185 gas at a flow rate of 2.0 mL min<sup>-1</sup> (Injector at 250°C).

186 The carbon isotope composition is given in the δ-notation (‰) relative to the Vienna Pee Dee  
187 Belemnite standard (Coplen et al 2006). Carbon isotope fractionation was calculated using the  
188 Rayleigh equation (eq 1) where R<sub>0</sub> and R<sub>t</sub> represents the isotope values and C<sub>0</sub> and C<sub>t</sub> the  
189 concentrations at time 0 and t (Elsner et al 2008, Elsner 2010).

$$190 \quad \ln \frac{R_t}{R_0} = \epsilon_C * \ln \frac{C_t}{C_0} \quad (1)$$

191 The carbon isotope enrichment factor (ε<sub>C</sub>) relates changes in the concentration of the isotopes to  
192 changes in their isotope composition. A two-tailed T-Test was used to calculate the 95 % confidence

193 interval based on the slope. Standard deviations were obtained from at least triplicate measurements  
194 (< 0.5 %).

### 195 **B<sub>12</sub> extraction and MS analysis**

196 The B<sub>12</sub> content of 100 mL culture was analyzed. For this, the culture volume was reduced to 20 mL  
197 using a vacuum concentrator and 0.1 M potassium cyanide was added. After boiling the samples for  
198 20 min, cell debris was removed by centrifugation (10 min, 6700 x g, 8°C). The supernatant was  
199 applied onto a C-18 column (CHROMABOND C-18 ec, Macherey-Nagel, Düren, Germany)  
200 equilibrated with 5 mL 100% (v/v) methanol and 5 mL ultrapure water (UPW). Washing of the column  
201 was done twice with 5 mL UPW and B<sub>12</sub>-types were eluted with 5 mL 100% (v/v) methanol. The eluate  
202 was completely dried in a vacuum dryer and dissolved in UPW prior to analysis. The extract was  
203 injected to ultrahigh performance nano-flow liquid chromatography (UHPLC) (Ultimate 3000, Thermo  
204 Fisher, Waltham, USA) coupled to mass spectrometer (LC-MS, Orbitrap Fusion, Thermo Fisher,  
205 Waltham, USA) via heated electrospray ionization (HESI-II, Thermo Fisher, Waltham, USA). The  
206 UHPLC was equipped with a Hypersil Gold C18 column (150 x 2.1 mm, 3 µm film thickness; Thermo  
207 Fisher, Waltham, USA) and a C18 guard column (10 x 2.1 mm, Waters, Milford, USA).  
208 Chromatographic separation using a gradient method with 0.1% formic acid (A) and methanol (B) as  
209 mobile phase was applied as following: 5% B for 1 min, 60 min gradient to 90% B, 4 min at 90% B, 1  
210 min gradient to 5% B and 4 min at 5% B with a constant flow of 0.2 mL min<sup>-1</sup> and 25°C column oven  
211 temperature. Injection volume was 5 µL. Ionization was set to positive ion mode at 3.5 kV, 35 arbitrary  
212 units (Arb) sheath gas, 10 Arb auxiliary gas, 325°C ion transfer tube temperature and 275°C vaporizer  
213 temperature. Orbitrap resolution for precursor scan (MS1) was set to 120.000 with a scan range of  
214 300-1600 *m/z*. Data evaluation was done on the original mass spectra comparing with predicted  
215 masses of corrinoids (Supplementary Table S2, for cobalamin standards see Supplementary Figure  
216 S3).

### 217 **Scanning Electron Microscopy and fluorescence in situ hybridization**

218 Field emission-scanning electron microscopy (FE-SEM) was performed with co-cultures of *S.*  
219 *multivorans* and *D. mccartyi* strains BTF08 and 195. Cells of 5 mL culture were incubated for 15 min  
220 with 2.5% glutaraldehyde and pre-fixed for 2 h on poly-L-lysine coated coverslips (12 mm, Fisher  
221 Scientific, Schwerte, Germany). Cover slides were washed three times with 0.1 M sodium cacodylate



222 (pH 7.2) (>98% purity, Sigma Aldrich, Steinheim, Germany) and post-fixed for 1 h with 1% osmium  
223 tetroxyde in the same cacodylate buffer. After fixation, samples were dehydrated using different  
224 ethanol concentrations (35%/50%/70%/80%/95%/100% v/v) and incubated for 10 min at each step.  
225 Critical point drying was done in a Leica EM CPD200 Automated Critical Point Dryer (Leica, Wetzlar,  
226 Germany), followed by coating with 6 nm platinum in a BAL-TEC MED 020 Sputter Coating System  
227 (BAL-TEC, Balzers, Liechtenstein). Imaging of the samples was done with a Zeiss-LEO 1530 Gemini  
228 field emission scanning electron microscope (Carl Zeiss, Oberkochen, Germany) at different  
229 magnifications and at 10 kV acceleration voltage. Fluorescence in situ hybridization (FISH) was  
230 performed as described previously (Fazi et al 2008, Maturro et al 2013). In brief, samples were fixed  
231 with formaldehyde (2% v/v final concentration) for 2 h at 4°C and filtered on polycarbonate membrane  
232 filters (47 mm diameter, 0.2 µm pore size, Nucleopore). Filters were stored at -20°C until further  
233 processing. FISH detection of *D. mccartyi* strain BTF08 and 195 was done with Cy3-labeled  
234 DHC1259t and DHC1259c probes and *S. multivorans* detection with FITC-labeled probes SULF  
235 F220ab (Rossetti et al 2008). Imaging of un-aggregated cells was done with an epifluorescence  
236 microscope (Olympus, BX51) combined with an Olympus XM10 camera. Images were analyzed via  
237 Cell-F software. Aggregates were visualized using a confocal laser scanning microscopy (CSLM,  
238 Olympus FV1000).

### 239 **Protein extraction and proteome analysis**

240 Cells were harvested after refeeding of the chloroethene (Supplementary Figure S14). Samples were  
241 processed as described previously (Jehmlich et al 2008). Briefly, protein extraction was performed in  
242 lysis buffer (20 mM HEPES, 1 mM sodium vanadate, 1mM β-glycerolphosphate, 2.5 mM sodium  
243 pyrophosphate, 8 M urea) by three freeze/thaw-cycles and ultrasonic bath treatments. Protein  
244 concentration was determined after protein extraction using the Bio-Rad Bradford reagent (Bio-Rad,  
245 Munich, Germany) and bovine serum albumin as protein standard. Ten µg protein was precipitated  
246 with five-fold ice-cold acetone. Protein pellets were dissolved in 50 µL SDS sample buffer (2% SDS, 2  
247 mM beta-mercaptoethanol, 4% glycerol, 40 mM Tris-HCl pH 6.8, 0.01% bromophenolblue), heated to  
248 90 °C for 5 min and separated on a SDS gel (12.5%). The gel was run until the samples entered the  
249 separating gel. Afterwards, a 3-5 mm protein band from each sample was cut out, destained,  
250 dehydrated, reduced with 10 mM dithiothreitol, alkylated with 100 mM iodoacetamide and  
251 proteolytically cleaved over night at 37°C using trypsin (Promega, Madison, WI, USA). Peptides were

252 extracted, desalted using C18 ZipTip columns (Merck Millipore, Darmstadt, Germany) and  
253 resuspended in 0.1% (v/v) formic acid before LC–MS/MS analysis.

254 Proteolytic lysates were separated using an Ultimate 3000 RSLCnano liquid chromatographic  
255 instrument (Thermo Scientific, Germany). Mass spectrometry was performed on an Orbitrap Fusion  
256 mass spectrometer (Thermo Scientific, San Jose, CA, USA) coupled to a TriVersa NanoMate (Advion,  
257 Ltd., Harlow, UK). Samples of 5  $\mu$ L were loaded onto a trapping column (Acclaim PepMap100 C18,  
258 75  $\mu$ m  $\times$  2 cm, Thermo Scientific) using 96% eluent A (0.1% formic acid) and 4% eluent B (0.08%  
259 formic acid, 80% acetonitrile) at a flow rate of 5  $\mu$ L min<sup>-1</sup> and separated via a 25 cm analytical column  
260 (Acclaim PepMap100 C18, 75  $\mu$ m  $\times$  25 cm, Thermo Scientific) at 35°C using a constant flow rate of  
261 300 nL/min. Peptide separation was achieved by applying a linear gradient of eluent B from 4% to  
262 50% within 100 min. Full MS scans were measured in the Orbitrap mass analyzer within the mass  
263 range of 400–1,600  $m/z$  at 120,000 resolution using an automatic gain control (AGC) target of  $4 \times 10^5$   
264 and maximum fill time of 60 ms. The MS instrument measured in data-dependent acquisition (DDA)  
265 mode using the highest intense ion (top speed, 3 sec cycle time). Positive ion charge states between 2  
266 and 7 were selected for MS/MS. Precursor masses for MS/MS were selected based on highest  
267 intensity and excluded from further MS/MS for 30 s to prevent redundancy in MS/MS acquisition. After  
268 higher energy collisional (HCD) fragmentation at normalized collision induced energy of 30%, fragment  
269 masses were scanned in the Orbitrap mass analyzer at a resolution of 15,000 with  $5 \times 10^4$  AGC target  
270 and a maximum injection time of 150 ms.

271 LC-MS/MS data were analyzed using Proteome Discoverer (v2.1, Thermo Scientific). MS/MS spectra  
272 were searched against a combination of a *S. multivorans* (3,233 non-redundant protein-coding  
273 sequences, downloaded January 2017 from NCBI GenBank, accession number CP007201.1) and a  
274 *D. mccartyi* BTF08 database (1,535 non-redundant protein-coding sequences, downloaded December  
275 2016 from NCBI, accession number CP004080.1). A “common repository of adventitious proteins  
276 database” (cRAP) was integrated to ensure correct protein identifications. The SEQUEST HT  
277 algorithm was used with the following settings: trypsin as cleavage enzyme, oxidation on methionine  
278 as dynamic and carbamidomethylation on cysteine as static modification, up to two missed cleavages,  
279 precursor mass tolerance set to 10 ppm and fragment mass tolerance to 0.02 Da, respectively. Only  
280 peptides with a false discovery rate (FDR) 1%, XCorr  $\geq 2$ , q-value and the posterior error probability  
281 (PEP)  $\leq 0.01$  were considered as identified (Supplementary Excel File S1). Quantification of proteins

282 was performed using the average of the top three peptide MS1 areas. After log10 transformation, the  
283 protein values were normalized to the median of all proteins of a sample, to the median of all proteins  
284 of the respective organism in that sample and to the median of all samples and scaled so that the  
285 global minimum is zero. Two outliers of the co-culture proteome replicates with only 11 (C3) and 92  
286 (P1, see Supplementary Excel File S1) protein identifications, compared to at least 317 protein  
287 identifications from the other *D. mccartyi* pure cultures, were excluded from the analysis. Proteins with  
288 only one out of three possible quantitative value per sample counted as identified only. P-values were  
289 calculated using a two-tailed, homoscedastic student's t-test and multiple corrected with the  
290 Benjamini-Hochberg method. Figures were created using an in-house written R-script with the  
291 packages gplots, ggplot2, ggbiplot, dplyr, miscTools and vegan. The non-parametrical multiple  
292 dimensional scaling (nMDS)-analysis was performed with the anosim-function of the vegan package in  
293 R (v3.4.1). *Pairwise Indicator Species Analysis* was used to identify proteins that were significantly  
294 associated with the different cultivation conditions (Kanehisa et al 2016, Marc and Pierre 1997). Indval  
295 scores and significances were calculated according to Malik et al. (Malik et al 2018).

296

## 297 Results

### 298 Growth and dechlorination in *Sulfurospirillum* (Sm)/*Dehalococcoides* (Dhc) co-cultures

299 To ensure optimal cultivation conditions for both organisms in the co-culture, *S. multivorans* was  
300 cultivated with lactate and PCE in *D. mccartyi* medium. We observed an equal growth behavior of *S.*  
301 *multivorans* compared to that in the medium routinely used for cultivation (Scholz-Muramatsu et al  
302 1995), data not shown). With lactate as electron donor and PCE as electron acceptor, a co-culture of  
303 *S. multivorans* and *D. mccartyi* BTF08 maintained over 10 transfers under the same conditions  
304 dechlorinated PCE to stoichiometric amounts of ethene within eight days after inoculation (Figure 1A,  
305 Table 1). The culture was re-fed with PCE at day 8 and day 12 after inoculation. After re-feeding, the  
306 dechlorination rate increased 2.8-fold (Figure 1A, Table 1) and complete dechlorination of PCE  
307 occurred within three days. PCE was dechlorinated to cDCE within two days. To check whether *S.*  
308 *multivorans*, known for its high dehalogenation rate, is responsible for this fast dechlorination, the  
309 stable carbon isotope fractionation patterns of pure and co-cultures were compared. No significant  
310 differences in the fractionation of PCE between *S. multivorans* pure and the Sm/Dhc co-cultures were  
311 found. The isotope fractionation pattern of PCE in the co-culture did not change significantly, and  
312 ranged from  $-30.2 \pm 0.09$  to  $-29.5 \pm 0.12$  ‰ at 70% of transformed PCE (Supplementary Figure S1A).  
313 A low but significant fractionation was measured in the pure culture of *S. multivorans* (from  $-29.2 \pm$   
314  $0.05$  to  $-27.6 \pm 0.11$  ‰ at 56% of transformed PCE, Supplementary Figure S1B). The isotope  
315 enrichment factors were calculated using the Rayleigh equation and were in the same range while  
316 differing largely from that of a *D. mccartyi* BTF08 pure culture (Sm/BTF08 co-culture:  $\epsilon_C = -0.4 \pm 0.3$   
317 ‰; *S. multivorans* pure culture:  $\epsilon_C = -2.0 \pm 0.4$  ‰, *D. mccartyi* BTF08:  $\epsilon_C = -5.0$  to  $-9.0$  ‰ (Franke *et*  
318 *al.*, unpublished)). The fast dechlorination of PCE to cDCE was also reflected in a fast increase of the  
319 *S. multivorans* cell number, corresponding to approximately 2.5 cell doublings during the first two days  
320 until PCE was completely dechlorinated to cDCE (Figure 1C). After this respiratory growth, lactate  
321 fermentation of *S. multivorans* started with a weaker growth observed. *D. mccartyi* BTF08 needed  
322 seven days for one cell doubling, but growth was also observed during the first two days. For both  
323 organisms, a correlation between dechlorination and growth was observed. The ratio between *S.*  
324 *multivorans* and *D. mccartyi* BTF08 cells changed from initially 2.6:1 to 5.9:1 after 2 days and 4.6:1  
325 after 15 days and two re-feeding steps. After 12 days, when the second dose of PCE was completely

326 dechlorinated to ethene, lactate was completely consumed, therefore lactate and PCE were re-fed.  
327 Acetate production occurred continuously during the whole dechlorination process (Figure 1E). No  
328 hydrogen was detected in the gas phase at any point (data not shown). The dechlorination rate (PCE  
329 to ethene) of the Sm/BTF08 co-culture was 4.5-fold faster compared to the *D. mccartyi* BTF08 culture.  
330 In the latter, PCE was completely reduced to ethene within 35 days at a rate of  $0.9 \pm 0.03$   
331  $\mu\text{mol/bottle/day}$ , which increased after re-feeding to  $1.4 \mu\text{mol/bottle/day}$  (Table 1, Supplementary  
332 Figure S2A).  
333 Similar growth characteristics and dechlorination behavior was observed in the Sm/195 co-culture  
334 cultivated under the same conditions, except that vinyl chloride (VC) was the major dechlorination  
335 product. The first dose of PCE was dechlorinated within 7 days stoichiometrically to VC (Figure 1B).  
336 The increase of cell number was slightly lower for *S. multivorans* and slightly higher for *D. mccartyi*  
337 195 compared to the Sm/BTF08 co-culture (Figure 1D). After the second dose of PCE was  
338 dechlorinated to VC, a low amount of ethene was produced starting on day 10, reaching  $10.4 \mu\text{mol}$   
339  $\text{ethene bottle}^{-1}$  after day 15. The Sm/195 co-culture reduced PCE to VC more than 3-fold faster than  
340 the *D. mccartyi* 195 pure culture. After re-feeding of PCE, this rate increased to nearly 8-fold faster  
341 (Table 1, Supplementary Figure S2B).

342

## 343 2. Corrinoid transfer in co-cultures and the effect of the lower corrinoid ligand

344 *D. mccartyi* strains rely on externally provided corrinoids for dehalogenation and growth, which was  
345 also tested for *D. mccartyi* strains BTF08 and 195, where only negligible cDCE dechlorination after  
346 100 days was observed without addition of corrinoid (Figure 2A and D). Therefore, it was of interest  
347 whether *S. multivorans* is able to provide functional corrinoids for *D. mccartyi* strains BTF08 and 195.  
348 In Sm/BTF08 co-cultures without the amendment of vitamin B<sub>12</sub>, stoichiometric dechlorination of PCE  
349 to cDCE was obtained ( $\sim 30 \mu\text{mol/bottle/day}$ ) (Figure 2B). No further dechlorination of cDCE to VC or  
350 ethene was detected, indicating that *S. multivorans* alone was responsible for the dechlorination.  
351 When cDCE dechlorination stalled in the Sm/BTF08 co-culture,  $1 \mu\text{M}$  5,6-dimethylbenzimidazole  
352 (DMB) was added, which resulted in subsequent cDCE dechlorination (Figure 2C). Ethene production  
353 rates from cDCE ( $3.6 \pm 0.2 \mu\text{mol/bottle/day}$ ) were similar to the co-culture amended with vitamin B<sub>12</sub>  
354 ( $4.1 \pm 0.2 \mu\text{mol/bottle/day}$ ). The dechlorination rate increased after re-feeding with PCE to 8

355  $\mu\text{mol/bottle/day}$ . In this set-up, three different types of corrinoids were found by mass spectrometric  
356 analysis: [Ade]NCba, [DMB]NCba and [DMB]Cba (Supplementary Figure S4).

357 Interestingly and in contrast to the Sm/BTF08 co-culture, the Sm/195 co-culture without vitamin B<sub>12</sub>  
358 amendment (-B<sub>12</sub>) dechlorinated PCE to VC, although at low rates (Figure 2E). After 35 days, PCE  
359 was re-fed, and cDCE to VC dechlorination increased to a 4-fold higher dechlorination rate (3.6  
360  $\mu\text{mol/bottle/day}$ ). The only corrinoid detected in the Sm/195 co-culture -B<sub>12</sub> was [Ade]NCba  
361 (Supplementary Figure S5). No significant increase in cDCE dechlorination was observed when 1  $\mu\text{M}$   
362 DMB was added to the Sm/195 co-culture (Figure 2F). Like in the Sm/BTF08 co-culture [Ade]NCba,  
363 [DMB]NCba and [DMB]Cba was found by mass spectrometric analysis when DMB was added  
364 (Supplementary Figure S6). To confirm whether *D. mccartyi* 195 can use [Ade]NCba for dechlorination  
365 of cDCE to VC, we amended a pure culture with [Ade]NCba isolated from *S. multivorans*  
366 (Supplementary Figure S7A). Dechlorination of 50  $\mu\text{mol}$  cDCE to VC was detected in 22 days. *D.*  
367 *mccartyi* 195 pure cultures amended with [5-OMeBza]Cba showed slightly faster dechlorination and  
368 the cDCE was converted within 16 days into VC (Supplementary Figure S7B). Only the amended  
369 corrinoid types were detected in the cultures via MS, impurities and rearrangement of corrinoids could  
370 be therefore excluded (Supplementary Information Figure S8 and S9).

371  
372

### 373 **3. Electron microscopy and FISH analysis of formed cell aggregates**

374 After about 25 transfers on lactate and PCE, all co-cultures formed spherical aggregates up to 2 mm in  
375 diameter (Figure 3A). Field emission-scanning electron microscopy (FE-SEM) was applied to uncover  
376 the cell morphology and cell distribution in these aggregates. After preparation for FE-SEM, the sizes  
377 of the aggregates were lower (30 to 200  $\mu\text{m}$ , Figure 3B and C.). Electron micrographs of both co-  
378 cultures revealed a compact network of *S. multivorans* and *D. mccartyi* cells coiled around net-forming  
379 filament-like structures. The cells were embedded in an extracellular matrix (ECM) which might aid  
380 cell-to-cell contact (Figure 3D, Supplementary Figure S10). *S. multivorans* could be distinguished from  
381 *D. mccartyi* by FISH with specific oligonucleotide probes targeting 16S rRNA and 3-dimensional  
382 imaging showed a spatial organization and an almost equal distribution of both species within the  
383 aggregates (Figure 3E, Supplementary Figure S12). The high resolution of the confocal laser scanning  
384 microscopy enabled visualization of single cells and revealed the same morphologies as in the

385 electron micrographs. In the FISH pictures, the sizes of the aggregates ranged from 50 to 100  $\mu\text{m}$  in  
386 diameter.

387 *S. multivorans* revealed a typical helical rod shaped cell structure and a size of 2 to 5  $\mu\text{m}$  to 0.5  $\mu\text{m}$  at  
388 magnifications of around 10.000x and 20.000x in FE-SEM as described previously (Scholz-Muramatsu  
389 et al 1995) (Figure 4, Supplementary Figure S10). However, the typical polar flagellum was only  
390 observed in a few cells and several flagella seemed to be detached from cells, possibly a part of the  
391 ECM (Figure 4, Supplementary Figure S10). *D. mccartyi* showed atypical cell morphology in the co-  
392 cultures. Microscopic analysis of the pure culture revealed a disc-shaped irregular coccus of 0.5  $\mu\text{m}$   
393 diameter (Figure 4a, Supplementary Figure S11), as previously described (Löffler et al 2013), whereas  
394 the *D. mccartyi* strains in the co-culture showed 0.5  $\mu\text{m}$  large barrel-like cells with a flattened cell pole  
395 at one side and a ring-shaped septum (Figure 4, Supplementary Figure S10). FISH analysis of  
396 isolated cells in the co-culture identified unequivocally both organisms and confirmed the presence  
397 and unusual morphology of *D. mccartyi* (Supplementary Figure S12 and S13).

398

399

400

#### 401 **4. Proteomics of pure and co-cultures**

402 We applied a label-free shotgun proteomics approach to identify changes in protein abundance during  
403 PCE dechlorination in pure and co-cultures (with and without vitamin B<sub>12</sub>) with *D. mccartyi* BTF08 and  
404 *S. multivorans*. Samples for proteomic analyses were taken after one re-feeding with PCE or cDCE  
405 (pure *D. mccartyi* cultures) or 12 hours after the third three re-feeding with PCE (co-cultures). While  
406 PCE, TCE and cDCE were the dominant chlorinated ethenes in the co-cultures, cDCE and VC were  
407 the dominant chlorinated ethenes in the pure culture when harvested (Supplementary Figure S14).  
408 The clustering approach nMDS based on quantified proteins revealed a significant separation between  
409 pure and co-cultures (*Dhc* BTF08 proteins  $p=0.001$ , *Sm* proteins  $p=0.004$ ), indicating a difference of  
410 the physiology of both organisms depending on the cultivation and (Supplementary Figure S15). A  
411 multi-level pattern analysis was applied to determine indicator proteins for a given condition (i.e. co-  
412 culture vs. pure culture) to better understand the functional changes occurring during the  
413 dehalogenation in the co-culture. This method was more promising than calculating the changes in

414 protein abundances between two conditions, since it was possible to compare all five conditions in the  
415 protein indicator analysis (Supplementary Excel File S2).

416 We detected only two RDase proteins of BTF08 among all proteomes, the gene products of *btf\_1393*  
417 and *btf\_1407* (*VcrA*). The two reductive dehalogenases *PceA* and *TceA*, putatively involved in  
418 dechlorination of PCE to cDCE, were not identified under any condition. While *VcrA* was one of the  
419 most abundant proteins under all tested conditions (Figure 5, Supplementary Excel File S1), the gene  
420 product of *btf\_1393* was more abundant in the two co-cultures (Figure 5, Supplementary Excel File  
421 S2). A BLASTp search against the NCBI nr database revealed that the *btf\_1393* amino acid sequence  
422 was almost identical (99% or 497/498 amino acid sequence identity over the whole length) to an *RdhA*  
423 from *D. mccartyi* 11a5, encoded by 11a5\_1355 and characterized as a novel PCE reductive  
424 dehalogenase *PteA* (Zhao et al 2017). In *S. multivorans*, the proteins encoded in the organohalide  
425 respiratory gene region including the PCE reductive dehalogenase *PceA* were present among all  
426 conditions as described previously (Goris et al 2015), albeit more prominent in the pure culture  
427 (Supplementary Excel File S1).

428 Only a few proteins encoded in the genomes of *S. multivorans* or *D. mccartyi* are annotated to play a  
429 potential role in the formation of an ECM, such as pili or proteins involved in the formation of  
430 extrapolymeric substances. The proteins which are part of a putative type II pili system in *D. mccartyi*  
431 (encoded by *btf\_1229* to *btf\_1240*) were present in low to medium amounts among all conditions  
432 (about median [Med] to lower than Med minus standard deviation [SD]) but not significantly more  
433 abundant in the co-cultures. Many proteins involved in flagellar motility of *S. multivorans* were lower  
434 abundant in the co-culture, with most of the *Flg* and *Fli* proteins not detected (Supplementary Excel  
435 File S1).

436 Protein indicator analysis revealed further, that several outer membrane porins of *S. multivorans*,  
437 (encoded by *SMUL\_0494*, *SMUL0693*, *SMUL\_0926* and *SMUL\_2351*), were significant indicator  
438 proteins for the co-cultures. The main porins of *S. multivorans* (*SMUL\_0627*, *SMUL\_0636* and  
439 *SMUL\_3013*) detected under all conditions and in the previous proteomic studies (Gadkari et al 2018,  
440 Goris et al 2015) were not significantly altered. Interestingly, several molybdopterin oxidoreductases of  
441 *S. multivorans* were highly abundant only in the co-culture (Supplementary Table S3). Among these  
442 enzymes often involved in anaerobic catabolism, were e.g. a nitrate reductase (*SMUL934-939*) and  
443 two polysulfide reductases (*SMUL0342-343* and *SMUL3274-3275*).



444 Proteins related to cell division (tubulin/GTase encoded by btf\_0551, FtsZ by btf\_0595, FtsH encoded  
445 by btf\_357, a cell division trigger factor encoded by btf\_0631) were more abundant or exclusively  
446 quantified in pure cultures (Figure 5, Supplementary Table S4, Supplementary Excel File S2). A  
447 hypothetical protein encoded close to the tubulin (btf\_0548) was also highly abundant (>Med+SD or  
448 >Med) only in cells of the pure culture, while it could not be quantified in any of the co-cultures.

449 The amidohydrolase CbiZ (btf\_610), responsible for cleavage of the nucleotide loop of corrinoids, was  
450 quantified only in both co-culture conditions in medium abundance (Figure 5). Several other proteins  
451 involved in corrinoid salvage could be quantified in all cultures, except the nicotinate-nucleotide-  
452 dimethylbenzimidazole phosphoribosyltransferase CobT (btf\_0613), which was not found in the co-  
453 culture amended with DMB. The L-threonine 3-O-phosphate decarboxylase CobD, which synthesizes  
454 the linker of the lower base and the corrinoid ring of cobamides, could not be quantified in any culture.  
455 Subunits of the vitamin B<sub>12</sub> transporter were detected in all cultures not differing significantly in  
456 abundance.

457

458

459

## 460 Discussion

461 In this study, we investigated the dechlorination of PCE to ethene (or vinyl chloride) in co-cultures of *S.*  
462 *multivorans* with *Dehalococcoides mccartyi* BTF08 and 195. Dechlorination profiles, metabolite  
463 analysis and growth studies point to a biphasic physiology of the co-culture. In the first stage, when  
464 PCE or TCE serve as electron acceptors, *S. multivorans* grows by organohalide respiration with  
465 lactate as electron donor. In this phase, *D. mccartyi* does not contribute significantly to PCE  
466 dechlorination as indicated by the stable isotope fractionation pattern and the corresponding  
467 enrichment factors. This can be explained by the insufficient supply of *D. mccartyi* with hydrogen as  
468 electron donor due to the lack of (or very low) hydrogen production by *S. multivorans* during  
469 respiratory growth. In the second phase of the co-culture, when PCE has been completely converted to  
470 cDCE after less than two days, *S. multivorans* grows via fermentation of lactate mainly to acetate, CO<sub>2</sub>  
471 and hydrogen. It has been shown earlier that, for thermodynamic reasons, lactate can only be utilized  
472 fermentatively by *S. multivorans* when the hydrogen concentration is very low (Kruse et al. 2018).

473 These conditions are fulfilled in the co-culture by *D. mccartyi* utilizing H<sub>2</sub> as electron donor for  
474 reductive dehalogenation of cDCE or VC in this phase (Figure 6). As expected, PCE was completely  
475 dechlorinated to ethene in the Sm/BTF08 co-culture and mainly to VC with minor amounts of ethene in  
476 Sm/195. A similar slow and incomplete VC dechlorination was found for pure cultures of the latter  
477 strain (Maymó-Gatell et al 2001) and co-cultures of *D. mccartyi* 195 with either *Desulfovibrio vulgaris*  
478 Hildenborough or *Syntrophomonas wolfei*, (Mao et al 2015, Men et al 2012). cDCE is presumably  
479 converted to ethene by VcrA of BTF08. This is supported by the proteomic analysis described here, in  
480 which VcrA of *D. mccartyi* BTF08 is highly abundant and the predominant RDase in all cultures. A  
481 highly similar VcrA ortholog of *D. mccartyi* strain VS (99% amino acid sequence identity) was  
482 biochemically characterized and described to dechlorinate cDCE and VC (Parthasarathy et al 2015).  
483 Interestingly, neither TceA, nor PceA, which were suggested to be responsible for dechlorination of  
484 PCE to VC (Pöritz et al., 2013), were detected in any of the samples. The only other RDase, encoded  
485 by *btf\_1393*, was detected mainly in the co-culture. An identical ortholog of this RDase was recently  
486 characterized as PteA, a novel PCE reductive dehalogenase dechlorinating PCE to TCE in *D. mccartyi*  
487 strain 11a5 (Zhao et al 2017). *D. mccartyi* 195 was not subject to proteomic investigation in our study.  
488 However, previous studies suggested that TceA of this organism is involved in cDCE to VC  
489 dechlorination and that VC is further dechlorinated slowly by the same enzyme (Magnuson et al 2000,  
490 Maymó-Gatell et al 2001).

491 The Sm/BTF08 co-culture was not capable of cDCE dechlorination to ethene without amendment of  
492 vitamin B<sub>12</sub>, indicating that *D. mccartyi* BTF08 cannot use the norpseudo-B<sub>12</sub> ([Ade]NCba) synthesized  
493 by *S. multivorans* for cDCE dechlorination. Complete dechlorination to ethene by *D. mccartyi* BTF08  
494 was restored by the addition of the lower ligand DMB, indicating that the non-functional adenosyl  
495 ligand could be replaced by DMB. This assumption is supported by a previous study, in which *D.*  
496 *mccartyi* was shown to incorporate different lower ligands into cobalamins (Yi et al., 2012). Therefore,  
497 it was not surprising that DMB-containing cobalamins were detected in the Sm/Dhc co-cultures. In  
498 addition to [Ade]NCba, which is produced by *S. multivorans*, [DMB]NCba and [DMB]Cba were found.  
499 Most probably, [DMB]NCba was synthesized by *S. multivorans* after addition of DMB besides  
500 [Ade]NCba, since the organism is able to incorporate different benzimidazoles and generate the  
501 corresponding cobalamins (Keller et al 2018, Schubert 2017). [DMB]Cba could then be produced  
502 during salvaging and remodeling of available [Ade]NCba and/or [DMB]NCba by *D. mccartyi*. It can,

503 however, not be excluded from our data that [DMB]NCba can be used as well by *D. mccartyi* BTF08  
504 for cDCE or VC dechlorination. The nucleotide loop cleavage is most likely mediated by the  
505 adenosylcobinamide hydrolase CbiZ, as shown for CbiZ of *Rhodobacter sphaeroides* (Gray and  
506 Escalante-Semerena 2009a, Gray and Escalante-Semerena 2009b). Of the two CbiZ encoded in the  
507 genome of *D. mccartyi* BTF08, one was detected in the proteome and showed a higher abundance in  
508 the co-culture compared to the pure culture. These results present evidence of the involvement of  
509 CbiZ in exchanging the complete nucleotide loop in *D. mccartyi*.

510 Opposed to the cDCE accumulation in Sm/BTF08 co-cultures grown without DMB, the Sm/195 co-  
511 culture dechlorinated PCE to VC in media without vitamin B<sub>12</sub> or DMB. This indicates cDCE to VC  
512 conversion by strain 195 with [Ade]NCba produced by *S. multivorans*. However, previous studies  
513 showed [Ade]Cba (or other cobalamins with adenine as lower ligand) to be non-functional in *D.*  
514 *mccartyi* strain 195 with TCE as electron acceptor (Yi et al 2012). Since RDase gene expression is  
515 often dependent on the electron acceptor present (Türkowsky et al 2018), cDCE in the Sm/195 co-  
516 culture might have induced a yet unknown RDase dechlorinating cDCE to VC with [Ade]NCba as  
517 cofactor. Alternatively, TceA containing [Ade]NCba could catalyze cDCE to VC dechlorination, but not  
518 TCE dechlorination to cDCE. The mechanism of cobalamin transfer from *S. multivorans* to *D. mccartyi*  
519 is not yet known. Most likely, cobalamin is released upon cell lysis or degradation of periplasmic PceA  
520 and possibly excreted through porins of *S. multivorans*, some of which were higher abundant in co-  
521 cultures.

522 The cultivation of *D. mccartyi* in association with *S. multivorans* led to the formation of cell aggregates,  
523 which is a common characteristic of obligate syntrophic interactions often found in e.g. acetogenic and  
524 methanogenic communities (Hulshoff Pol et al 2004, Ishii et al 2005, Stams et al 2012). FISH staining  
525 confirmed the close association of both organisms and provided first insights into the organization and  
526 spatial distribution of the organisms within aggregates in a dechlorinating mixed culture. Electron  
527 microscopic analysis of the co-cultures revealed cells in close physical contact embedded in an ECM  
528 consisting of extracellular polymer substances (EPS)-like structures and surrounding filaments  
529 including also flagella detached from *S. multivorans* cells. The decrease of intermicrobial distances  
530 and establishment of cell-to-cell contacts should lead to increased metabolite fluxes (e.g. hydrogen)  
531 between species according to Fick's law (Schink and Thauer 1988), ultimately enhancing growth and  
532 dechlorination rates. Experimentally, this was shown, for example, during syntrophic propionate

533 conversion of *Pelotomaculum thermopropionicum* SI and *Methanothermobacter thermoautotrophicus*  
534  $\Delta$ H where interspecies hydrogen transfer was calculated to be optimal in aggregates (Ishii et al 2006).  
535 EPS-like substances and flagella most likely contribute to a stabilization of aggregates by adhesion  
536 and attachment of the cells (Grotenhuis et al 1991, Ishii et al 2005). In association with *S. multivorans*,  
537 *D. mccartyi* showed a barrel-like morphology with a septum-like structure, which is in contrast to the  
538 irregular disc-shaped coccus as found in pure culture. This morphology might be caused by the down-  
539 regulation of proteins involved in cell division in the co-culture. One of these proteins, FtsZ, localized at  
540 the cell division site, was shown to play a key role in cytokinesis in *E. coli*. It was shown to be  
541 responsible for septal invagination of the cell wall and cytoplasmic membrane by forming a ring-  
542 shaped septum followed by cell division (Bi and Lutkenhaus 1991, de Boer et al 1992, Lutkenhaus  
543 1993). Its down-regulation might hamper a complete membrane constriction resulting in slower cell  
544 division that might cause the observed barrel-like cell morphologies. However, this conclusion is  
545 speculative and needs more investigation. Since electron micrographs of co-cultures with *D. mccartyi*  
546 are scarce, it is not possible to state whether the unusual cell morphology is specific for the  
547 partnership with *S. multivorans* or whether it is found frequently for co-cultures containing *D. mccartyi*.  
548 With *S. wolfei* as syntrophic partner, disc-like cell structures typical for *D. mccartyi* strain 195 were  
549 observed (Mao et al 2015).

550 This study provides first insights into the interactions of *S. multivorans* in association with other  
551 organohalide-respiring bacteria. Dechlorinating microbial communities sometimes reveal the presence  
552 of *Sulfurospirillum* spp., but the functional role of these Epsilonproteobacteria is unexplored (Goris and  
553 Diekert 2016). We observed that interspecies hydrogen and cobamide transfer in the co-culture  
554 resulted in fast and complete dechlorination of PCE to ethene. *S. multivorans* could provide all growth  
555 factors required by *D. mccartyi*, including hydrogen and cDCE as energy source, acetate as carbon  
556 source and cobamides as RDase cofactors (Figure 6). It is the first study in which *D. mccartyi* was  
557 provided with all nutrients required for growth by its syntrophic partner. Additionally, PCE to cDCE  
558 dechlorination is sped up by the fast dechlorination rate of *S. multivorans*. This is of high interest for  
559 bioremediation attempts using *Dehalococcoides*-containing mixed cultures, since electron donor and  
560 cobalamin limitations often impede *Dehalococcoides* dechlorination activities. Thus, the established  
561 co-culture efficiently detoxifying PCE to ethene has potential for bioaugmentation processes.

562

563

## 564 **Acknowledgement**

565 This work was supported by the Jena School for Microbial Communication (JSMC) and the DFG  
566 Research Unit FOR 1530 (sub-projects 1, 2, 5 and 6 were involved). The authors would like to thank  
567 Benjamin Scheer and Kathleen Eismann (Helmholtz Centre for Environmental Research, Leipzig) for  
568 skillfull technical assistance in the lab, Susanne Linde (University Hospital Jena, Center for Electron  
569 Microscopy) for the field-emission scanning electron microscopic analysis and Dr. Elena Romano  
570 (University of Rome Tor Vergata, Department of Biology) for invaluable assistance in the confocal  
571 laser scanning microscope image acquisition and processing. Dr. Torsten Schubert (Friedrich Schiller  
572 University Jena) is gratefully acknowledged for insightful discussions on corrinoid metabolism.

## 573 **Conflict of interest**

574 The authors declare no conflict of interests.

## 575 **References**

- 576 Bi E, Lutkenhaus J (1991). FtsZ ring structure associated with division in *Escherichia coli*. *Nature* **354**:  
577 161.
- 578  
579 Cheng D, Chow WL, He J (2010). A *Dehalococcoides*-containing co-culture that dechlorinates  
580 tetrachloroethene to *trans*-1,2-dichloroethene. *ISME J* **4**: 88-97.
- 581  
582 Cichocka D, Nikolausz M, Haest PJ, Nijenhuis I (2010). Tetrachloroethene conversion to ethene by a  
583 *Dehalococcoides*-containing enrichment culture from Bitterfeld. *FEMS Microbiol Ecol* **72**: 297-310.
- 584  
585 Coplen TB, Brand WA, Gehre M, Gröning M, Meijer HA, Toman B *et al* (2006). After two decades a  
586 second anchor for the VPDB delta13C scale. *Rapid Commun Mass Spectrom* **20**: 3165-3166.
- 587  
588 de Boer P, Crossley R, Rothfield L (1992). The essential bacterial cell-division protein FtsZ is a GTPase.  
589 *Nature* **359**: 254.
- 590  
591 DiStefano TD, Gossett JM, Zinder SH (1992). Hydrogen as an electron donor for dechlorination of  
592 tetrachloroethene by an anaerobic mixed culture. *Appl Environ Microbiol* **58**: 3622-3629.
- 593  
594 Duhamel M, Edwards EA (2006). Microbial composition of chlorinated ethene-degrading cultures  
595 dominated by *Dehalococcoides*. *FEMS Microbiology Ecology* **58**: 538-549.

596

- 597 Duhamel M, Edwards EA (2007). Growth and yields of dechlorinators, acetogens, and methanogens  
598 during reductive dechlorination of chlorinated ethenes and dihaloelimination of 1,2-dichloroethane.  
599 *Environ Sci Technol* **41**: 2303-2310.
- 600  
601 Elsner M, Chartrand M, Vanstone N, Couloume GL, Lollar BS (2008). Identifying abiotic chlorinated  
602 ethene degradation: characteristic isotope patterns in reaction products with nanoscale zero-valent  
603 iron. *Environ Sci Technol* **42**: 5963-5970.
- 604  
605 Elsner M (2010). Stable isotope fractionation to investigate natural transformation mechanisms of  
606 organic contaminants: principles, prospects and limitations. *J Environ Monit* **12**: 2005-2031.
- 607  
608 Fazi S, Aulenta F, Majone M, Rossetti S (2008). Improved quantification of Dehalococcoides species  
609 by fluorescence in situ hybridization and catalyzed reporter deposition. *Syst Appl Microbiol* **31**: 62-67.
- 610  
611 Gadkari J, Goris T, Schiffmann CL, Rubick R, Adrian L, Schubert T *et al* (2018). Reductive  
612 tetrachloroethene dehalogenation in the presence of oxygen by *Sulfurospirillum multivorans*:  
613 physiological studies and proteome analysis. *FEMS Microbiology Ecology* **94**: fix176.
- 614  
615 Goris T, Schiffmann CL, Gadkari J, Schubert T, Seifert J, Jehmlich N *et al* (2015). Proteomics of the  
616 organohalide-respiring Epsilonproteobacterium *Sulfurospirillum multivorans* adapted to  
617 tetrachloroethene and other energy substrates. *Scientific Reports* **5**: 13794.
- 618  
619 Goris T, Diekert G (2016). The Genus *Sulfurospirillum*. In: Adrian L, Löffler FE (eds). *Organohalide-*  
620 *Respiring Bacteria*. Springer-Verlag: Berlin, Heidelberg. pp 209-234.
- 621  
622 Goris T, Schenz B, Zimmermann J, Lemos M, Hackermüller J, Schubert T *et al* (2017). The complete  
623 genome of the tetrachloroethene-respiring Epsilonproteobacterium *Sulfurospirillum halorespirans*.  
624 *Journal of Biotechnology* **255**: 33-36.
- 625  
626 Gray MJ, Escalante-Semerena JC (2009a). In Vivo Analysis of Cobinamide Salvaging in *Rhodobacter*  
627 *sphaeroides* Strain 2.4.1. *Journal of Bacteriology* **191**: 3842-3851.
- 628  
629 Gray MJ, Escalante-Semerena JC (2009b). The cobinamide amidohydrolase (cobyrinic acid-forming)  
630 CbiZ enzyme: A critical activity of the cobamide remodeling system of *Rhodobacter sphaeroides*.  
631 *Molecular microbiology* **74**: 1198-1210.
- 632  
633 Grotenhuis JTC, Smit M, van Lammeren AAM, Stams AJM, Zehnder AJB (1991). Localization and  
634 quantification of extracellular polymers in methanogenic granular sludge. *Applied Microbiology and*  
635 *Biotechnology* **36**: 115-119.
- 636  
637 Guimaraes D, Weber A, Klaiber I, Vogler B, Renz P (1994). Guanylcobamide and  
638 hypoxanthylcobamide: corrinoids formed by *Desulfovibrio vulgaris*. *Archives of Microbiology* **162**:  
639 272-276.

- 640  
641 He J, Ritalahti KM, Aiello MR, Löffler FE (2003a). Complete detoxification of vinyl chloride by an  
642 anaerobic enrichment culture and identification of the reductively dechlorinating population as a  
643 *Dehalococcoides* species. *Appl Environ Microbiol* **69**: 996-1003.
- 644  
645 He J, Ritalahti KM, Yang KL, Koenigsberg SS, Löffler FE (2003b). Detoxification of vinyl chloride to  
646 ethene coupled to growth of an anaerobic bacterium. *Nature* **424**: 62-65.
- 647  
648 He J, Holmes VF, Lee PK, Alvarez-Cohen L (2007). Influence of vitamin B<sub>12</sub> and cocultures on the  
649 growth of *Dehalococcoides* isolates in defined medium. *Appl Environ Microbiol* **73**: 2847-2853.
- 650  
651 Hulshoff Pol LW, de Castro Lopes SI, Lettinga G, Lens PNL (2004). Anaerobic sludge granulation.  
652 *Water Research* **38**: 1376-1389.
- 653  
654 Ishii S, Kosaka T, Hori K, Hotta Y, Watanabe K (2005). Coaggregation facilitates interspecies hydrogen  
655 transfer between *Pelotomaculum thermopropionicum* and *Methanothermobacter*  
656 *thermautotrophicus*. *Appl Environ Microbiol* **71**: 7838-7845.
- 657  
658 Ishii Si, Kosaka T, Hotta Y, Watanabe K (2006). Simulating the Contribution of Coaggregation to  
659 Interspecies Hydrogen Fluxes in Syntrophic Methanogenic Consortia. *Applied and Environmental*  
660 *Microbiology* **72**: 5093-5096.
- 661  
662 Jehmlich N, Schmidt F, von Bergen M, Richnow H-H, Vogt C (2008). Protein-based stable isotope  
663 probing (Protein-SIP) reveals active species within anoxic mixed cultures. *The ISME journal* **2**: 1122.
- 664  
665 Jugder BE, Ertan H, Bohl S, Lee M, Marquis CP, Manfield M (2016). Organohalide Respiring Bacteria  
666 and Reductive Dehalogenases: Key Tools in Organohalide Bioremediation. *Front Microbiol* **7**: 249.
- 667  
668 Kanehisa M, Sato Y, Morishima K (2016). BlastKOALA and GhostKOALA: KEGG Tools for Functional  
669 Characterization of Genome and Metagenome Sequences. *J Mol Biol* **428**: 726-731.
- 670  
671 Keller S, Ruetz M, Kunze C, Kräutler B, Diekert G, Schubert T (2014). Exogenous 5,6-  
672 dimethylbenzimidazole caused production of a non-functional tetrachloroethene reductive  
673 dehalogenase in *Sulfurospirillum multivorans*. *Environmental Microbiology* **16**: 3361-3369.
- 674  
675 Keller S, Kunze C, Bommer M, Paetz C, Menezes RC, Svatoš A *et al* (2018). Selective utilization of  
676 benzimidazolyl-norcobamides as cofactors by the tetrachloroethene reductive dehalogenase of  
677 *Sulfurospirillum multivorans*. *J Bac.* Mar 2018, **200**: e00584-17.
- 678  
679 Kräutler B, Fieber W, Ostermann S, Fasching M, Ongania K-H, Gruber K *et al* (2003). The Cofactor of  
680 Tetrachloroethene Reductive Dehalogenase of *Dehalospirillum multivorans* Is Norpseudo-B<sub>12</sub>, a New  
681 Type of a Natural Corrinoid. *Helvetica Chimica Acta* **86**: 3698-3716.
- 682

- 683 Kruse S, Goris T, Westermann M, Adrian L, Diekert G (2018). Hydrogen production by *Sulfurospirillum*  
684 species enables syntrophic interactions of Epsilonproteobacteria. *Nat Comm.* **9**: 4872.
- 685  
686 Kruse S, Goris T, Wolf M, Wei X, Diekert G (2017b). The NiFe Hydrogenases of the Tetrachloroethene-  
687 Respiring Epsilonproteobacterium *Sulfurospirillum multivorans*: Biochemical Studies and  
688 Transcription Analysis. *Front Microbiol* **8**: 444.
- 689  
690 Leys D, Adrian L, Smidt H (2013). Organohalide respiration: microbes breathing chlorinated  
691 molecules. *Philos Trans R Soc Lond B Biol Sci* **368**: 20120316.
- 692  
693 Löffler FE, Yan J, Ritalahti KM, Adrian L, Edwards EA, Konstantinidis KT *et al* (2013). *Dehalococcoides*  
694 *mccartyi* gen. nov., sp. nov., obligately organohalide-respiring anaerobic bacteria relevant to halogen  
695 cycling and bioremediation, belong to a novel bacterial class, *Dehalococcoidia* classis nov., order  
696 *Dehalococcoidales* ord. nov. and family *Dehalococcoidaceae* fam. nov., within the phylum Chloroflexi.  
697 *Int J Syst Evol Microbiol* **63**: 625-635.
- 698  
699 Lutkenhaus J (1993). FtsZ ring in bacterial cytokinesis. *Molecular Microbiology* **9**: 403-409.
- 700  
701 Magnuson JK, Romine MF, Burris DR, Kingsley MT (2000). Trichloroethene reductive dehalogenase  
702 from *Dehalococcoides ethenogenes*: sequence of *tceA* and substrate range characterization. *Appl*  
703 *Environ Microbiol* **66**: 5141-5147.
- 704  
705 Malik A, Puissant J, Buckeridge K, Goodall T, Jehmlich N, Chowdhury S *et al* (2018). Land use driven  
706 change in soil pH affects microbial carbon cycling processes.. *Nat Comm.* **9**: 3591.
- 707  
708 Mao X, Stenuit B, Polasko A, Alvarez-Cohen L (2015). Efficient Metabolic Exchange and Electron  
709 Transfer within a Syntrophic Trichloroethene-Degrading Coculture of *Dehalococcoides mccartyi* 195  
710 and *Syntrophomonas wolfei*. *Applied and Environmental Microbiology* **81**: 2015-2024.
- 711  
712 Marc D, Pierre L (1997). Species assemblages and indicator species: the need for a flexible  
713 asymmetrical approach. *Ecological Monographs* **67**: 345-366.
- 714  
715 Matturro B, Tandoi V, Rossetti S (2013). Different activity levels of *Dehalococcoides mccartyi* revealed  
716 by FISH and CARD-FISH under non-steady and pseudo-steady state conditions. *N Biotechnol* **30**: 756-  
717 762.
- 718  
719 Maymo-Gatell X, Chien Y, Gossett JM, Zinder SH (1997). Isolation of a bacterium that reductively  
720 dechlorinates tetrachloroethene to ethene. *Science* **276**: 1568-1571.
- 721  
722 Maymó-Gatell X, Anguish T, Zinder SH (1999). Reductive dechlorination of chlorinated ethenes and 1,  
723 2-dichloroethane by "Dehalococcoides ethenogenes" 195. *Appl Environ Microbiol* **65**: 3108-3113.
- 724



- 725 Maymó-Gatell X, Nijenhuis I, Zinder SH (2001). Reductive Dechlorination of cis-1,2-Dichloroethene  
726 and Vinyl Chloride by “*Dehalococcoides ethenogenes*”. *Environmental Science & Technology* **35**: 516-  
727 521.
- 728  
729 Men Y, Feil H, Verberkmoes NC, Shah MB, Johnson DR, Lee PK *et al* (2012). Sustainable syntrophic  
730 growth of *Dehalococcoides ethenogenes* strain 195 with *Desulfovibrio vulgaris* Hildenborough and  
731 *Methanobacterium congolense*: global transcriptomic and proteomic analyses. *The ISME journal* **6**:  
732 410-421.
- 733  
734 Men Y, Seth EC, Yi S, Allen RH, Taga ME, Alvarez-Cohen L (2014). Sustainable Growth of  
735 *Dehalococcoides mccartyi* 195 by Corrinoid Salvaging and Remodeling in Defined Lactate-Fermenting  
736 Consortia. *Applied and Environmental Microbiology* **80**: 2133-2141.
- 737  
738 Morris BE, Henneberger R, Huber H, Moissl-Eichinger C (2013). Microbial syntrophy: Interaction for  
739 the common good. *FEMS Microbiol Rev* **37**: 384-406.
- 740  
741 Neumann A, Wohlfarth G, Diekert G (1996). Purification and Characterization of Tetrachloroethene  
742 Reductive Dehalogenase from *Dehalospirillum multivorans*. *Journal of Biological Chemistry* **271**:  
743 16515-16519.
- 744  
745 Parthasarathy A, Stich TA, Lohner ST, Lesnefsky A, Britt RD, Spormann AM (2015). Biochemical and  
746 EPR-Spectroscopic Investigation into Heterologously Expressed Vinyl Chloride Reductive  
747 Dehalogenase (VcrA) from *Dehalococcoides mccartyi* Strain VS. *Journal of the American Chemical*  
748 *Society* **137**: 3525-3532.
- 749  
750 Richardson R (2016). Organohalide-Respiring Bacteria as Members of Microbial Communities:  
751 Catabolic Food Webs and Biochemical Interactions. In: Adrian L, Löffler F (eds). *Organohalide-*  
752 *respiring Bacteria*. Springer: Berlin Heidelberg. pp 309-341.
- 753  
754 Richardson RE, Bhupathiraju VK, Song DL, Goulet TA, Alvarez-Cohen L (2002). Phylogenetic  
755 characterization of microbial communities that reductively dechlorinate TCE based upon a  
756 combination of molecular techniques. *Environ Sci Technol* **36**: 2652-2662.
- 757  
758 Rossetti S, Aulenta F, Majone M, Crocetti G, Tandoi V (2008). Structure analysis and performance of a  
759 microbial community from a contaminated aquifer involved in the complete reductive dechlorination  
760 of 1,1,2,2-tetrachloroethane to ethene. *Biotechnol Bioeng* **100**: 240-249.
- 761  
762 Schink B, Thauer RK (1988). Energetics of syntrophic methane formation and the influence of  
763 aggregation. In: G L, AJB Z, JTC G, LW H (eds). *Granular anaerobic sludge: microbiology and*  
764 *technology*: Puduc, Wageningen. pp 5-17.
- 765  
766 Schink B, Stams A (2013). Syntrophism Among Prokaryotes. In: Rosenberg E, DeLong E, Lory S,  
767 Stackebrandt E, Thompson F (eds). *The Prokaryotes : Prokaryotic Communities and Ecophysiology*.  
768 Springer: Berlin Heidelberg. pp 471-493.

- 769  
770 Schipp CJ, Marco-Urrea E, Kublik A, Seifert J, Adrian L (2013). Organic cofactors in the metabolism of  
771 *Dehalococcoides mccartyi* strains. *Philos Trans R Soc Lond B Biol Sci* **368**: 20120321.
- 772  
773 Schmidt M, Lege S, Nijenhuis I (2014). Comparison of 1,2-dichloroethane, dichloroethene and vinyl  
774 chloride carbon stable isotope fractionation during dechlorination by two *Dehalococcoides* strains.  
775 *Water Res* **52**: 146-154.
- 776  
777 Scholz-Muramatsu H, Neumann A, Meßmer M, Moore E, Diekert G (1995). Isolation and  
778 characterization of *Dehalospirillum multivorans* gen. nov., sp. nov., a tetrachloroethene-utilizing,  
779 strictly anaerobic bacterium. *Archives of Microbiology* **163**: 48-56.
- 780  
781 Schubert T, Diekert G (2016). Comparative Biochemistry of Organohalide Respiration. In: Adrian L,  
782 Löffler FE (eds). *Organohalide-Respiring Bacteria*. Springer Berlin Heidelberg: Berlin, Heidelberg. pp  
783 397-427.
- 784  
785 Schubert T (2017). The organohalide-respiring bacterium *Sulfurospirillum multivorans*: a natural  
786 source for unusual cobamides. *World Journal of Microbiology and Biotechnology* **33**: 93.
- 787  
788 Schubert T, Adrian L, Sawers RG, Diekert G (2018). Organohalide respiratory chains: composition,  
789 topology and key enzymes. *FEMS Microbiology Ecology* **94**: fiy035-fiy035.
- 790  
791 Schubert T, von Reuß SH, Kunze C, Paetz C, Kruse S, Brand-Schön P, Nelly AM, Nüske J, Diekert G  
792 (2018). Guided cobamide biosynthesis for heterologous production of reductive dehalogenases.  
793 *Microbiol Biotechnol*. Dec 13. doi:10.1111/1751-7915.13339
- 794  
795 Stams AJ, Plugge CM (2009). Electron transfer in syntrophic communities of anaerobic bacteria and  
796 archaea. *Nat Rev Microbiol* **7**: 568-577.
- 797  
798 Stams AJM, Worm P, Sousa DZ, Alves MM, Plugge CM (2012). Syntrophic Degradation of Fatty Acids  
799 by Methanogenic Communities. In: Hallenbeck PC (ed). *Microbial Technologies in Advanced Biofuels*  
800 *Production*. Springer US: Boston, MA. pp 127-142.
- 801  
802 Türkowsky D, Jehmlich N, Diekert G, Adrian L, von Bergen M, Goris T (2018). An integrative overview  
803 of genomic, transcriptomic and proteomic analyses in organohalide respiration research. *FEMS*  
804 *Microbiol Ecol* **94**.
- 805  
806 Wei K, Grostern A, Chan WWM, Richardson RE, Edwards EA (2016). Electron Acceptor Interactions  
807 Between Organohalide-Respiring Bacteria: Cross-Feeding, Competition, and Inhibition. In: Adrian L,  
808 Löffler FE (eds). *Organohalide-Respiring Bacteria*. Springer Berlin Heidelberg: Berlin, Heidelberg. pp  
809 283-308.
- 810

811 Yan J, Ritalahti KM, Wagner DD, Löffler FE (2012). Unexpected Specificity of Interspecies Cobamide  
812 Transfer from *Geobacter* spp. to Organohalide-Respiring *Dehalococcoides mccartyi* Strains. *Applied*  
813 *and Environmental Microbiology* **78**: 6630-6636.

814  
815 Yan J, Im J, Yang Y, Löffler FE (2013). Guided cobalamin biosynthesis supports *Dehalococcoides*  
816 *mccartyi* reductive dechlorination activity. *Philos Trans R Soc Lond B Biol Sci* **368**: 20120320.

817  
818 Yi S, Seth EC, Men Y-J, Stabler SP, Allen RH, Alvarez-Cohen L *et al* (2012). Versatility in Corrinoid  
819 Salvaging and Remodeling Pathways Supports Corrinoid-Dependent Metabolism in *Dehalococcoides*  
820 *mccartyi*. *Applied and Environmental Microbiology* **78**: 7745-7752.

821  
822 Zhao S, Ding C, He J (2017). Genomic characterization of *Dehalococcoides mccartyi* strain 11a5  
823 reveals a circular extrachromosomal genetic element and a new tetrachloroethene reductive  
824 dehalogenase gene. *FEMS Microbiology Ecology* **93**: fiw235-fiw235.

825  
826 Zinder S (2016). The Genus *Dehalococcoides*. In: Adrian L, Löffler F (eds). *Organohalide-respiring*  
827 *Bacteria*. Springer: Berlin Heidelberg. pp 107-136

828

829

830 **Table 1: Dechlorination rates** of different co-culture set-ups of *S. multivorans* and *D. mccartyi* BTF08 or 195 to  
831 the corresponding end product VC or ethene. n. a. - not applied.

|                                             |                | Dechlorination rate ( $\mu\text{mol day}^{-1} \text{ bottle}^{-1}$ ) |                          |                          |
|---------------------------------------------|----------------|----------------------------------------------------------------------|--------------------------|--------------------------|
|                                             |                | 1 <sup>st</sup> dose PCE                                             | 2 <sup>nd</sup> dose PCE | 3 <sup>rd</sup> dose PCE |
| Organism(s)                                 | Electron donor |                                                                      |                          |                          |
| <b>With vitamin B<sub>12</sub></b>          |                |                                                                      |                          |                          |
| <i>D. mccartyi</i> BTF08                    | H <sub>2</sub> | 0.9 ± 0.03                                                           | 1.4 ± 0.09               | n.a.                     |
| <i>D. mccartyi</i> 195                      | H <sub>2</sub> | 1.5 ± 0.04                                                           | 3.3 ± 0.17               | n.a.                     |
| Sm/BTF08                                    | Lactate        | 4.1 ± 0.2                                                            | 11.6 <sup>#</sup>        | 11.6 <sup>#</sup>        |
| Sm/195                                      | Lactate        | 4.8 ± 0.1                                                            | 11.6 <sup>#</sup>        | 11.6 <sup>#</sup>        |
| <b>Without vitamin B<sub>12</sub></b>       |                |                                                                      |                          |                          |
| Sm/BTF08                                    | Lactate        | -                                                                    | -                        | -                        |
| Sm/195                                      | Lactate        | 0.9 ± 0.004                                                          | 3.6 <sup>#</sup>         | 3.6 <sup>#</sup>         |
| <b>Without vitamin B<sub>12</sub> + DMB</b> |                |                                                                      |                          |                          |
| Sm/BTF08                                    | Lactate        | 3.6 ± 0.2                                                            | 8.0 <sup>#</sup>         | 8.0 <sup>#</sup>         |
| Sm/195                                      | Lactate        | 0.8 ± 0.05                                                           | 4.3 <sup>#</sup>         | 4.3 <sup>#</sup>         |

832 <sup>#</sup>, no standard deviation, since the PCE values for re-feeding are theoretical values of the amount PCE added to  
833 the culture and were not measured.

834

835

836

837 **Figure 1: Dechlorination of chlorinated ethenes, growth and metabolite analysis of *S. multivorans*/D.**  
838 ***mccartyi* co-cultures with vitamin B<sub>12</sub> amendment.** (A) PCE dechlorination of Sm/BTF08 and (B) Sm/195. (C)  
839 Growth curve of Sm/BTF08 and (D) Sm/195. (E) Lactate consumption and acetate production of Sm/BTF08 and  
840 (F) Sm/195. Arrows indicate the time points of re-feeding the culture with PCE (A-D) or lactate (E and F). Broken  
841 red lines with open symbols represent theoretical, not analytical, values of the PCE concentration as added to the  
842 culture. Please note the secondary y-axes for *D. mccartyi* cell numbers in C and D. Negative controls were run  
843 with autoclaved cells (abiotic controls, C). Standard deviation of three independent biological replicates (N=3) is  
844 represented by error bars (not visible when smaller than the used symbol).  $\Sigma$  - mass balance; sum of PCE, TCE,  
845 *cis*-DCE, VC and ethene.

846

847 **Figure 2: Dechlorination of *S. multivorans*/D. *mccartyi* co-cultures without addition of vitamin B<sub>12</sub>.** (A)  
848 Strain BTF08 with *c*DCE as electron acceptor (negative control). (B) Sm/BTF08 with PCE as the electron  
849 acceptor. (C) Sm/BTF08 with PCE as electron acceptor and amendment of 1  $\mu$ M DMB. (D) Strain 195 with *c*DCE  
850 as electron acceptor (negative control). (E) Sm/195 with PCE as the electron acceptor. (F) Sm/195 with PCE as  
851 electron acceptor and amendment of 1  $\mu$ M DMB. Please note the different time scales. All growth experiments  
852 were conducted in biological triplicates (N=3). Arrows indicate re-feeding of PCE.  $\Sigma$  - mass balance; sum of PCE,  
853 TCE, *c*DCE, VC and ethene.

854

855 **Figure 3: Microscopic analysis of cell aggregates in co-cultures of *S. multivorans* and *D. mccartyi* strain**  
856 **195 and BTF08.** (A) Serum bottle (200 mL) of a Sm/BTF08 co-culture showing cell aggregates. (B) Light  
857 microscopic image of a Sm/BTF08 aggregate. (C, D) Scanning electron micrographs of an aggregate of Sm/195.  
858 (E) Confocal laser scanning image of FISH stained aggregates of Sm/BTF08. Red - *S. multivorans*, green - *D.*  
859 *mccartyi*.

860

861 **Figure 4: Different cell morphologies of *D. mccartyi* strain BTF08 cells.** In pure culture (A) and co-culture  
862 with *S. multivorans* (B, C). White arrows indicate flagella and yellow arrows indicate ring-shaped septum.

863

864 **Figure 5: Protein abundances of reductive dehalogenases and significant indicator proteins of Dhc BTF08**  
865 **in pure and co-cultures.** Average protein abundance values under different cultivation conditions are shown.  
866 Abundances represent log<sub>10</sub> fold changes of the median, scaled to zero. The median of all proteins is at about  
867 2.3 (see Supplementary Figure S16, which also shows each replicate in a scatter plot graph). Four replicates  
868 (N=4) were used for proteomic analyses; one of the four replicates were discarded from each of the *D. mccartyi*  
869 pure cultures (see Methods). Error bars represent standard deviation which is covered completely by the symbol if  
870 <0.1. D – *D. mccartyi* BTF08 pure culture, C – Smul/BTF08 co-culture, CbiZ - adenosylcobinamide  
871 amidohydrolase (btf\_610), FtsZ - cell division protein (btf\_0595), FtsZ/Tubulin GTPase (btf\_0551), VcrA - vinyl  
872 chloride reductive dehalogenase (btf\_1407), btf\_1393 - reductive dehalogenase homolog to 11a5\_1355 of *D.*  
873 *mccartyi* 11a5.  
874

875 **Figure 6: Interspecies metabolite transfer of *Sulfurospirillum multivorans* and *Dehalococcoides mccartyi*.**  
876 PCE is dechlorinated to *c*DCE by *S. multivorans* with electrons from lactate oxidation. After depletion of PCE, *S.*  
877 *multivorans* switches to fermentative metabolism, thereby generating hydrogen which is consumed by *D.*  
878 *mccartyi* as electron donor. The electron acceptor for *D. mccartyi* is *c*DCE and is further dechlorinated to ethene  
879 or VC by *D. mccartyi*. *S. multivorans* synthesizes norpseudo B<sub>12</sub> ([Ade]NCba, ●) and [DMB]NCba, ● when DMB is  
880 amended. Both can be salvaged and remodeled by *D. mccartyi* into [DMB]Cba (● with a y-shaped linker). The  
881 interspecies cobamide transfer is indicated by yellow arrows. A discrimination between norcobamide or cobamide  
882 incorporation into the *D. mccartyi* RDases is not depicted here, since the data do not allow a conclusion on the  
883 cobalamin nucleotide loop type.

884

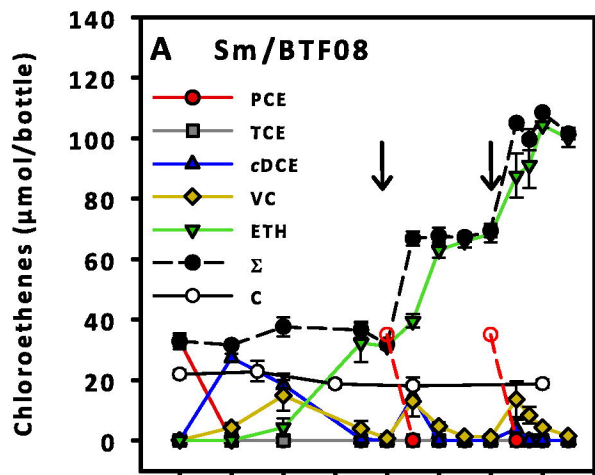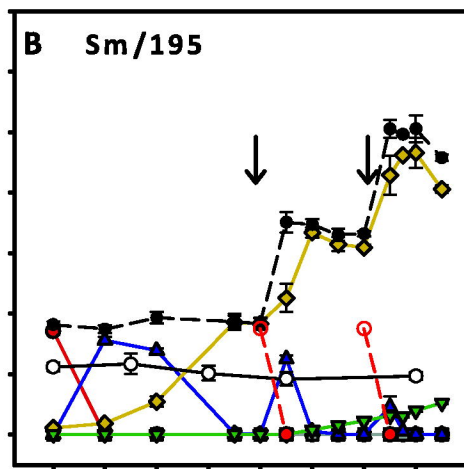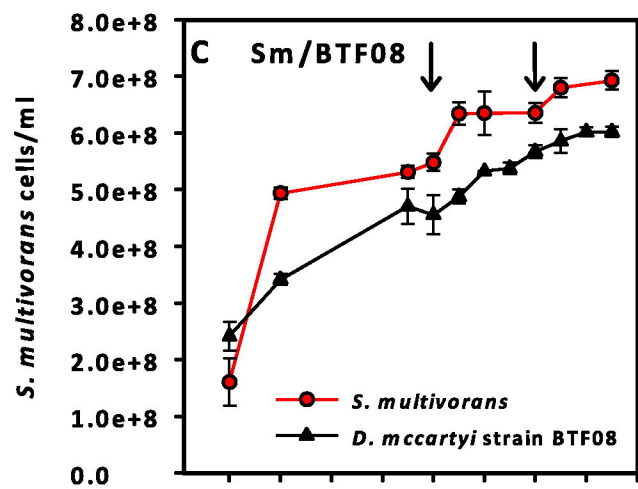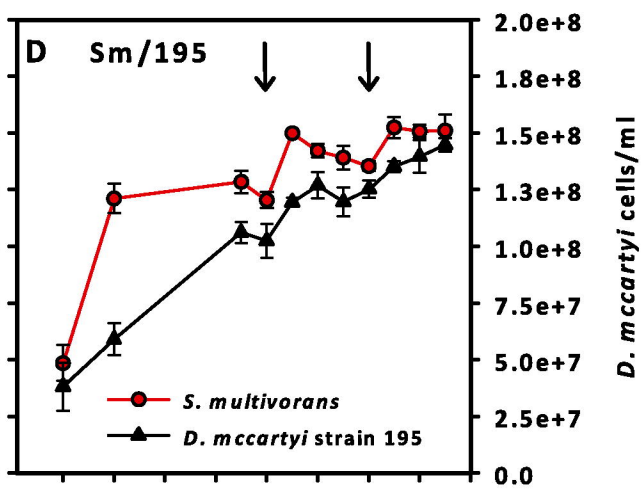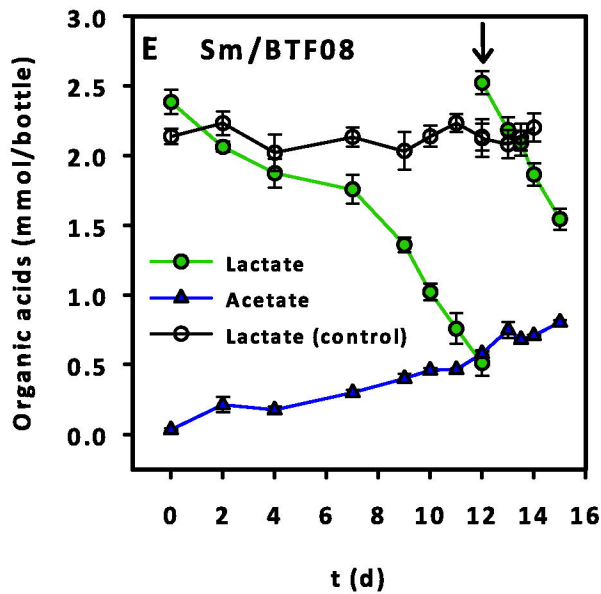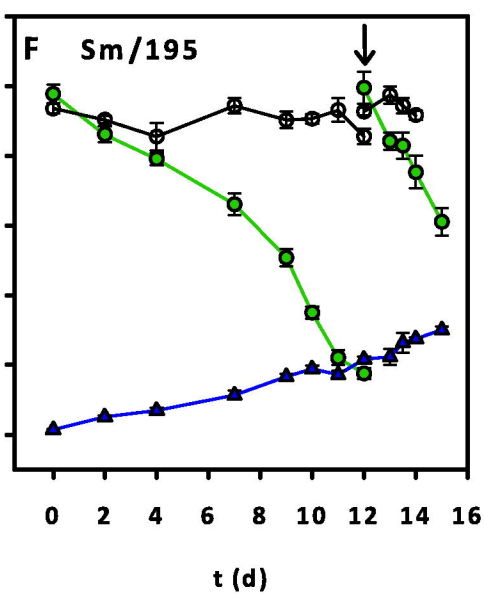

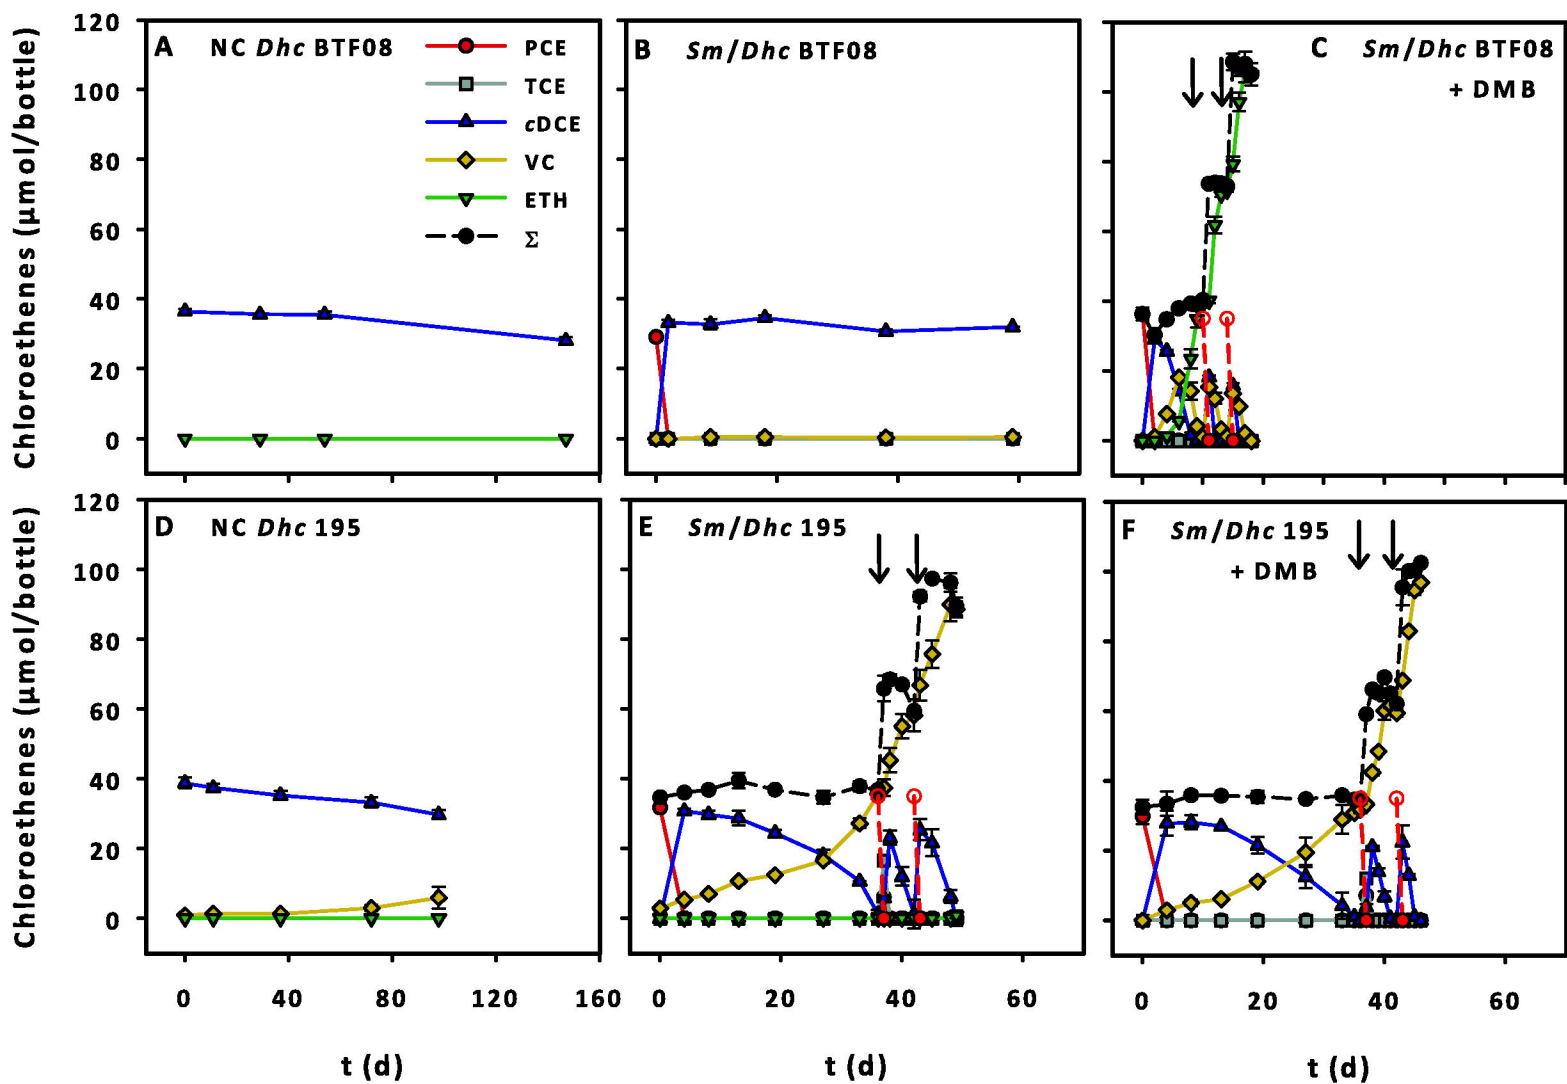

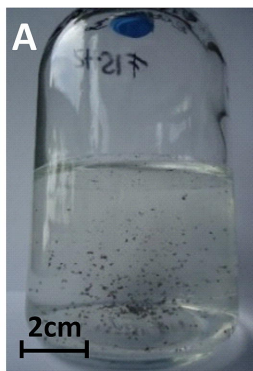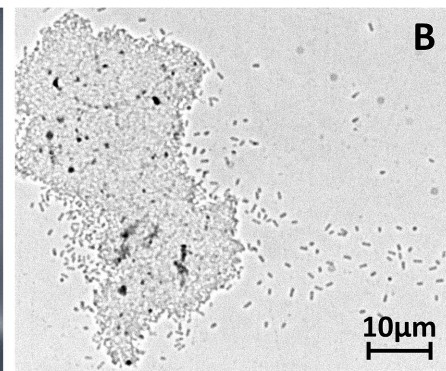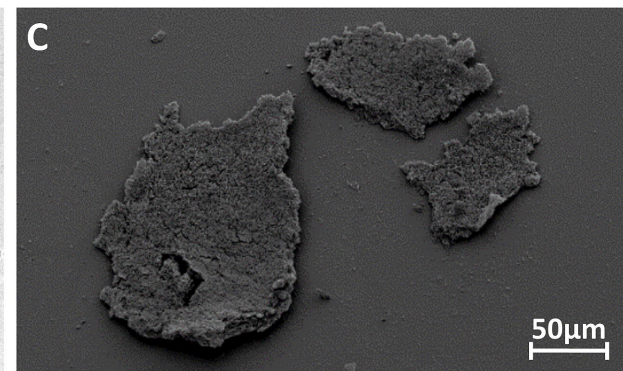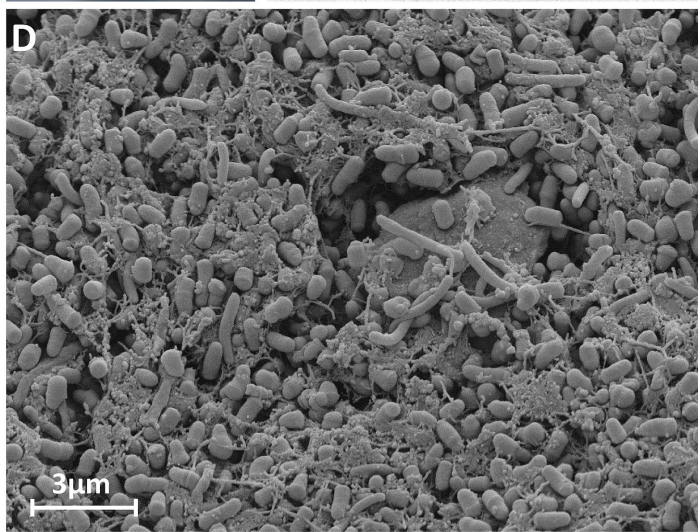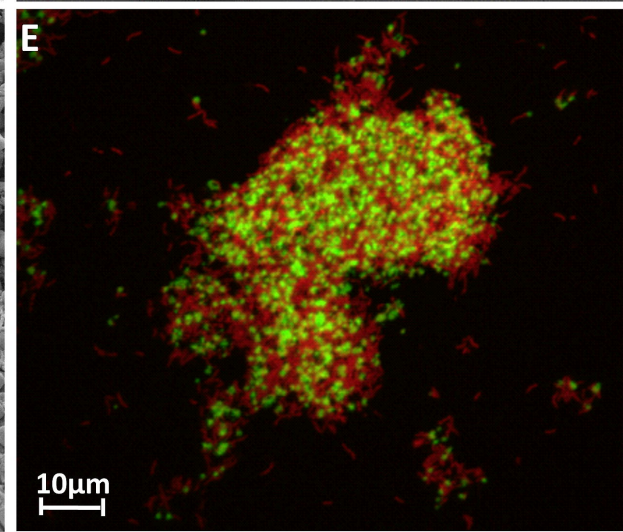

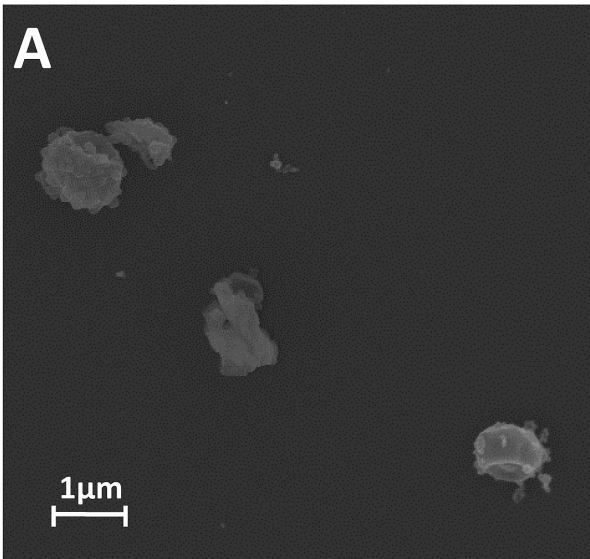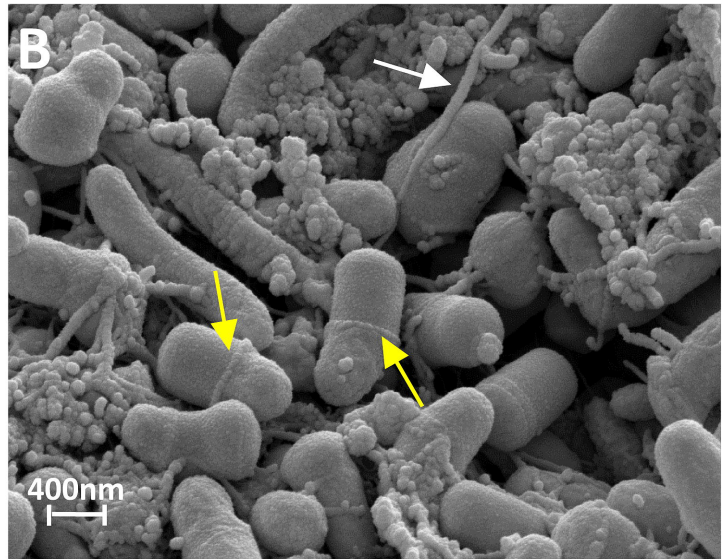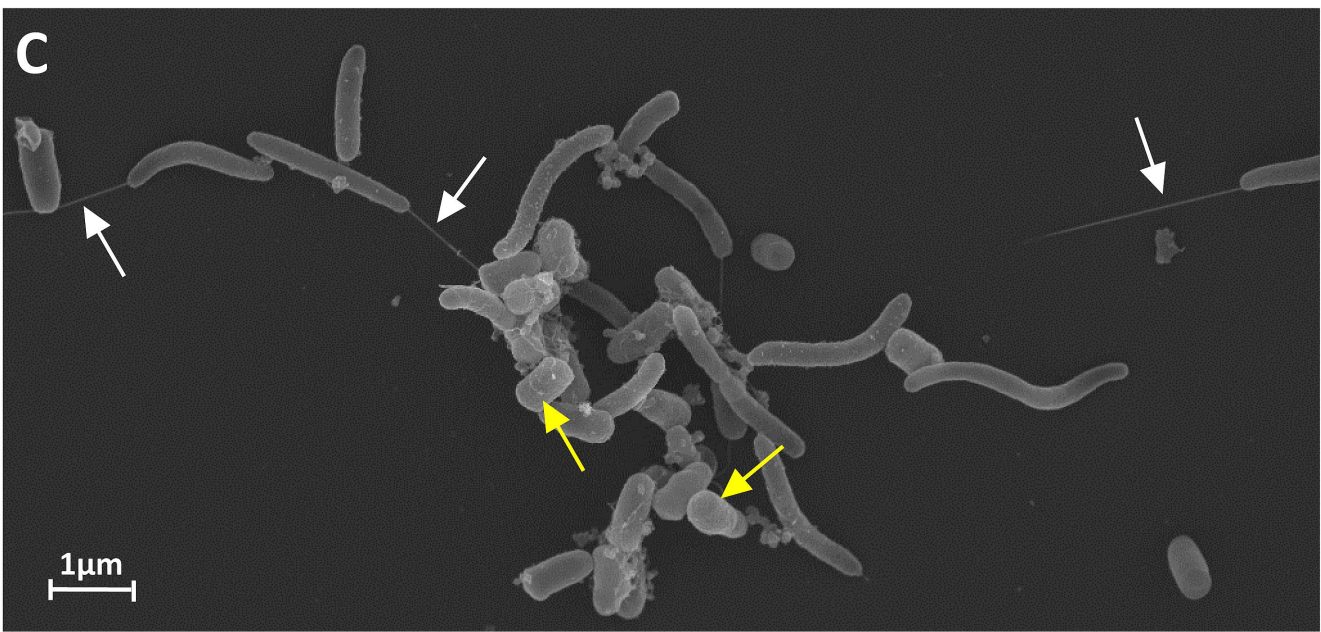



Relative abundance (log)

4  
3  
2  
1  
0

CbiZ

FtsZ

FtsZ/  
Tubulin GTPase

Btf\_1393

VcrA

not quantified

not identified

P

C

P

C

P

C

P

C

P

C

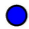

H<sub>2</sub>/cDCE

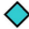

H<sub>2</sub>/PCE

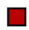

Lac/PCE + B<sub>12</sub>

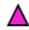

Lac/PCE - B<sub>12</sub> + DMB

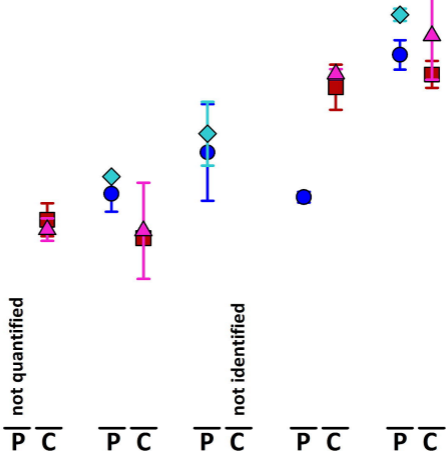

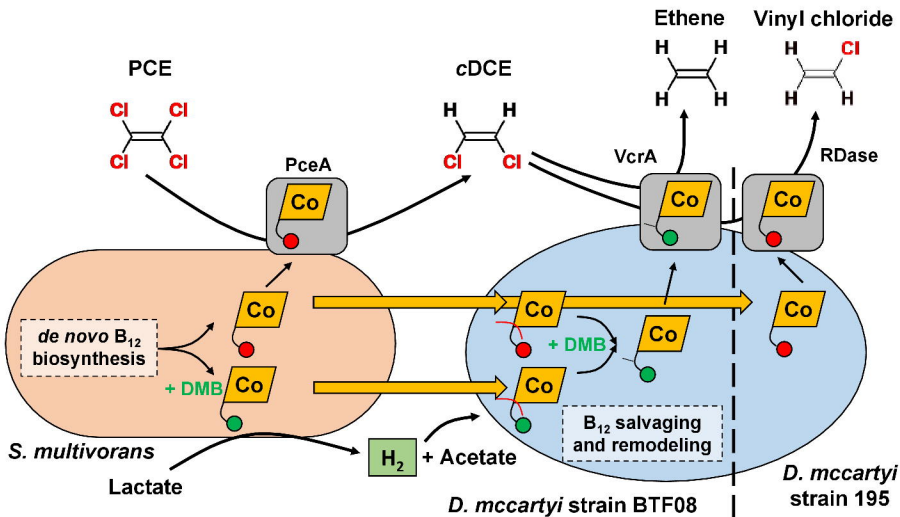

Source: https://www.biorxiv.org/content/10.1101/526210v1.full.pdf
